# Supplementary material for: Synthesis of apiose-containing oligosaccharide fragments of the plant cell wall: fragments of rhamnogalacturonan-II side chains A and B, and apiogalacturonan
Source: Royal Society of Chemistry journal article supplement (doi:10.1039/c1ob05587a), 2011-01-01

## Electronic Supplementary Information

### Synthesis of apiose-containing oligosaccharide fragments of the plant cell wall: fragments of rhamnogalacturonan-II side chains A and B, and apiogalacturonan

Sergey A. Nepogodiev,<sup>a,b,\*</sup> Margherita Fais,<sup>a,b</sup> David L. Hughes<sup>b</sup> and Robert A. Field<sup>a,b,\*</sup>

<sup>a</sup>Department of Biological Chemistry, John Innes Centre, Norwich Research Park, Norwich NR4 7UH, UK;

<sup>b</sup>School of Chemistry, University of East Anglia, Norwich Research Park Norwich, NR4 7TJ, UK.

### Table of Contents

|                                                                                                                                                                                                                                                                                                           |     |
|-----------------------------------------------------------------------------------------------------------------------------------------------------------------------------------------------------------------------------------------------------------------------------------------------------------|-----|
| Crystal structure analysis of methyl C-(4- <i>O</i> -acetyl-2,3- <i>O</i> -carbonyl-β-L-rhamnopyranosyloxymethyl)-(1→3')-(2,3- <i>O</i> -( <i>R</i> )-benzylidene-β-D-erythrofuranosyl)-(1→2)-(methyl (2- <i>O</i> -acetyl-3,4- <i>O</i> -isopropylidene-α-D-galactopyranosid)uronate) ( <b>41</b> )..... | S3  |
| <sup>1</sup> H NMR (400 MHz) and <sup>13</sup> C NMR (100 MHz) data for protected saccharide derivatives and oligosaccharides <b>1–4</b> (in D <sub>2</sub> O)                                                                                                                                            |     |
| 1- <i>O</i> -Acetyl-3- <i>C</i> -acetoxymethyl-2,3- <i>O</i> -isopropylidene-β-D-erythrofurano- <b>(8)</b> .....                                                                                                                                                                                          | S5  |
| p-Tolyl 3- <i>C</i> -acetoxymethyl-2,3- <i>O</i> -isopropylidene-1-thio-α-D-erythrofurano- <b>(9a)</b> .....                                                                                                                                                                                              | S6  |
| p-Tolyl 3- <i>C</i> -acetoxymethyl-2,3- <i>O</i> -isopropylidene-1-thio-β-D-erythrofurano- <b>(9b)</b> .....                                                                                                                                                                                              | S7  |
| Methyl (methyl 3,4- <i>O</i> -isopropylidene-α-D-galactopyranosid)uronate ( <b>12</b> ) .                                                                                                                                                                                                                 | S8  |
| Methyl (3- <i>C</i> -acetoxymethyl-2,3- <i>O</i> -isopropylidene-β-D-erythrofuranosyl)-(1→2)-(methyl 3,4- <i>O</i> -isopropylidene-α-D-galactopyranosid)uronate ( <b>13</b> ) .....                                                                                                                       | S9  |
| Methyl (2,3- <i>O</i> -isopropylidene-β-D-erythrofuranosyl)-(1→2)-(methyl 3,4- <i>O</i> -isopropylidene-α-D-galactopyranosid)uronate ( <b>14</b> ) .....                                                                                                                                                  | S10 |
| Methyl (4- <i>O</i> -acetyl-2,3- <i>O</i> -carbonyl-β-L-rhamnopyranosyloxymethyl)-(1→3)- <i>C</i> -(2,3- <i>O</i> -isopropylidene-β-D-erythrofuranosyl)-(1→2)-(methyl 3,4- <i>O</i> -isopropylidene-α-D-galactopyranosid)uronate ( <b>16</b> ) .....                                                      | S11 |
| Methyl (β-L-rhamnopyranosyloxymethyl)-(1→3)- <i>C</i> -(2,3- <i>O</i> -isopropylidene-β-D-erythrofuranosyl)-(1→2)-(methyl 3,4- <i>O</i> -isopropylidene-α-D-galactopyranosid)uronate ( <b>17</b> ) .....                                                                                                  | S12 |
| p-Tolyl 3- <i>C</i> -acetoxymethyl-2,3-di- <i>O</i> -acetyl-1-thio-α,β-D-erythrofurano- <b>(22a and 22b)</b> .....                                                                                                                                                                                        | S13 |
| Methyl (3- <i>C</i> -acetoxymethyl-2,3-di- <i>O</i> -acetyl-β-D-erythrofuranosyl)-(1→2)-(methyl 3,4- <i>O</i> -isopropylidene-α-D-galactopyranosid)uronate ( <b>23</b> ) .....                                                                                                                            | S14 |
| Methyl (methyl 3,4- <i>O</i> -(1-ethoxyethylidene)-α-D-galactopyranosid)uronate ( <b>24</b> ) .....                                                                                                                                                                                                       | S15 |
| Methyl (methyl 2- <i>O</i> -benzoyl-3,4- <i>O</i> -(1-ethoxyethylidene)-α-D-galactopyranosid)uronate ( <b>25</b> ) ....                                                                                                                                                                                   | S16 |
| Methyl (methyl 4- <i>O</i> -acetyl-2- <i>O</i> -benzoyl-α-D-galactopyranosid)uronate ( <b>26</b> ) .....                                                                                                                                                                                                  | S17 |
| Methyl (methyl 4- <i>O</i> -acetyl-α-D-galactopyranosid)uronate ( <b>27</b> ) .....                                                                                                                                                                                                                       | S18 |
| Methyl (3- <i>C</i> -acetoxymethyl-2,3,di- <i>O</i> -acetyl-β-D-erythrofuranosyl)-(1→3)-(methyl 4- <i>O</i> -acetyl-2-                                                                                                                                                                                    | S19 |

|                                                                                                                                                                                                                                                                                                                                       |     |
|---------------------------------------------------------------------------------------------------------------------------------------------------------------------------------------------------------------------------------------------------------------------------------------------------------------------------------------|-----|
| <i>O</i> -benzoyl- $\alpha$ -D-galactopyranosid)uronate ( <b>28</b> ) .....                                                                                                                                                                                                                                                           | S20 |
| Methyl (3- <i>C</i> -acetoxymethyl-2,3-di- <i>O</i> -acetyl- $\beta$ -D-erythrofuransyl)-(1 $\rightarrow$ 2)-[(3- <i>C</i> -acetoxymethyl-2,3-di- <i>O</i> -acetyl- $\beta$ -D-erythrofuransyl)-(1 $\rightarrow$ 3)]-(methyl 4- <i>O</i> -acetyl- $\alpha$ -D-galactopyranosid)uronate ( <b>29</b> ) .....                            | S20 |
| L-Arabinose di( <i>p</i> -tolyl)dithioacetal ( <b>30</b> ) .....                                                                                                                                                                                                                                                                      | S21 |
| 2,3:4,5-Di- <i>O</i> -isopropylidene-L-arabinose di( <i>p</i> -tolyl)dithioacetal ( <b>31</b> ) .....                                                                                                                                                                                                                                 | S22 |
| 2,3- <i>O</i> -Isopropylidene-L-arabinose di( <i>p</i> -tolyl)dithioacetal ( <b>32</b> ) .....                                                                                                                                                                                                                                        | S23 |
| 2,3- <i>O</i> -Isopropylidene-L- <i>erythro</i> -tetrodialdose di( <i>p</i> -tolyl)dithioacetal ( <b>33</b> ) .....                                                                                                                                                                                                                   | S24 |
| 3- <i>C</i> -Hydroxymethyl-2,3- <i>O</i> -isopropylidene- <i>D-glycero</i> -tetrose di( <i>p</i> -tolyl)dithioacetal ( <b>34</b> ) .....                                                                                                                                                                                              | S25 |
| <i>p</i> -Tolyl 3- <i>C</i> -hydroxymethyl-2,3- <i>O</i> -isopropylidene-1-thio- $\alpha,\beta$ -D-erythrofuranside ( <b>35a,b</b> ) .....                                                                                                                                                                                            | S26 |
| <i>p</i> -Tolyl 3- <i>C</i> -chloroacetoxymethyl-2,3- <i>O</i> -isopropylidene-1-thio- $\alpha$ -D-erythrofuranside ( <b>36a</b> ) .....                                                                                                                                                                                              | S27 |
| <i>p</i> -Tolyl 3- <i>C</i> -chloroacetoxymethyl-2,3- <i>O</i> -isopropylidene-1-thio- $\alpha$ -D-erythrofuranside ( <b>36b</b> ) .....                                                                                                                                                                                              | S28 |
| <i>p</i> -Tolyl 3- <i>C</i> -chloroacetoxymethyl-1-thio- $\alpha,\beta$ -D-erythrofuranside ( <b>37</b> ) .....                                                                                                                                                                                                                       | S29 |
| <i>p</i> -Tolyl 3- <i>C</i> -chloroacetoxymethyl-2,3- <i>O</i> -( <i>S</i> )-benzylidene-1-thio- $\alpha$ -D-erythrofuranside ( <b>38a</b> ) ...                                                                                                                                                                                      | S30 |
| <i>p</i> -Tolyl 3- <i>C</i> -chloroacetoxymethyl-2,3- <i>O</i> -( <i>S</i> )-benzylidene-1-thio- $\beta$ -D-erythrofuranside ( <b>38b</b> ) ....                                                                                                                                                                                      | S31 |
| Methyl (2,3- <i>O</i> -( <i>S</i> )-benzylidene-3- <i>C</i> -chloroacetoxymethyl- $\beta$ -D-erythrofuransyl)-(1 $\rightarrow$ 2)-(methyl 2- <i>O</i> -acetyl-3,4- <i>O</i> -isopropylidene- $\beta$ -D-galactopyranosid)uronate ( <b>39</b> ) .....                                                                                  | S32 |
| Methyl (2,3- <i>O</i> -( <i>S</i> -benzylidene-3- <i>C</i> -hydroxymethyl- $\beta$ -D-erythrofuransyl)-(1 $\rightarrow$ 2)-(methyl 2- <i>O</i> -acetyl-3,4- <i>O</i> -isopropylidene- $\alpha$ -D-galactopyranosid)uronate) ( <b>40</b> ) .....                                                                                       | S33 |
| Methyl <i>C</i> -(4- <i>O</i> -acetyl-2,3- <i>O</i> -carbonyl- $\beta$ -L-rhamnopyranosyloxymethyl)-(1 $\rightarrow$ 3')-(2,3- <i>O</i> -( <i>S</i> )-benzylidene- $\beta$ -D-erythrofuransyl)-(1 $\rightarrow$ 2)-(methyl 2- <i>O</i> -acetyl-3,4- <i>O</i> -isopropylidene- $\beta$ -D-galactopyranosid)uronate ( <b>41</b> ) ..... | S34 |
| Methyl <i>C</i> -(4- <i>O</i> -acetyl-2,3- <i>O</i> -carbonyl- $\beta$ -L-rhamnopyranosyloxymethyl)-(1 $\rightarrow$ 3')-( $\beta$ -D-erythrofuransyl)-(1 $\rightarrow$ 2)-(methyl (2- <i>O</i> -acetyl-3,4- <i>O</i> -isopropylidene- $\beta$ -D-galactopyranosid)uronate) .....                                                     | S35 |
| Methyl <i>C</i> -( $\beta$ -L-rhamnopyranosyloxymethyl)-(1 $\rightarrow$ 3)- $\beta$ -D-erythrofuransyl-(1 $\rightarrow$ 2)-(methyl $\alpha$ -D-galactopyranosid)uronate ( <b>42</b> ) .....                                                                                                                                          | S36 |
| Methyl <i>C</i> -( $\beta$ -L-rhamnopyranosyloxymethyl)-(1 $\rightarrow$ 3)- $\beta$ -D-erythrofuransyl-(1 $\rightarrow$ 2)- $\alpha$ -D-galactopyranosiduronic acid ( <b>1</b> ) .....                                                                                                                                               | S37 |
| Methyl (3- <i>C</i> -hydroxymethyl- $\beta$ -D-erythrofuransyl)-(1 $\rightarrow$ 2)- $\alpha$ -D-galactopyranosiduronic acid ( <b>2</b> ) .....                                                                                                                                                                                       | S38 |
| Methyl (3- <i>C</i> -hydroxymethyl- $\beta$ -D-erythrofuransyl)-(1 $\rightarrow$ 3)- $\alpha$ -D-galactopyranosiduronic acid ( <b>3</b> ) .....                                                                                                                                                                                       | S39 |
| Methyl (3- <i>C</i> -hydroxymethyl- $\beta$ -D-erythrofuransyl)-(1 $\rightarrow$ 2)-[3- <i>C</i> -hydroxymethyl- $\beta$ -D-erythrofuransyl-(1 $\rightarrow$ 3)]-( $\alpha$ -D-galactopyranosiduronic acid) ( <b>4</b> ) .....                                                                                                        | S40 |

**Crystal structure analysis of Methyl C-(4-O-acetyl-2,3-O-carbonyl-β-L-rhamnopyranosyl-oxymethyl)-(1→3')-(2,3-O-(R)-benzylidene-β-D-erythrofuranosyl)-(1→2)-(methyl (2-O-acetyl-3,4-O-isopropylidene-α-D-galactopyranosid)uronate) (41)**

*Crystal data:* C<sub>32</sub>H<sub>40</sub>O<sub>17</sub>, CH<sub>2</sub>Cl<sub>2</sub>, M = 781.6. Orthorhombic, space group P2<sub>1</sub>2<sub>1</sub>2<sub>1</sub> (no. 19), a = 11.2799(6), b = 15.1788(9), c = 21.4815(13) Å, V = 3678.0(4) Å<sup>3</sup>. Z = 4, D<sub>c</sub> = 1.411 g cm<sup>-3</sup>, F(000) = 1640, T = 140(1) K, μ(Mo-Kα) = 2.5 cm<sup>-1</sup>, λ(Mo-Kα) = 0.71069 Å.

Crystals are beautiful, colourless prisms. One, *ca* 0.52 x 0.25 x 0.24 mm, was mounted in oil on a glass fibre and fixed in the cold nitrogen stream on an Oxford Diffraction Xcalibur-3 CCD diffractometer equipped with Mo-Kα radiation and graphite monochromator. Intensity data were measured by thin-slice ω- and φ-scans. Total no. of reflections recorded, to θ<sub>max</sub> = 27.5°, was 49119 of which 8410 were unique (R<sub>int</sub> = 0.045); 7002 were 'observed' with I > 2σ<sub>I</sub>.

Data were processed using the CrysAlis-CCD and -RED (1) programs. The structure was determined by the direct methods routines in the SHELXS program (2A) and refined by full-matrix least-squares methods, on F<sup>2</sup>'s, in SHELXL (2B). The non-hydrogen atoms were refined with anisotropic thermal parameters. Hydrogen atoms were included in idealised positions and their U<sub>iso</sub> values were set to ride on the U<sub>eq</sub> values of the parent carbon atoms. At the conclusion of the refinement, wR<sub>2</sub> = 0.093 and R<sub>1</sub> = 0.049 (2B) for all 8410 reflections weighted w = [σ<sup>2</sup>(F<sub>o</sub><sup>2</sup>) + (0.0556P)<sup>2</sup>]<sup>-1</sup> with P = (F<sub>o</sub><sup>2</sup> + 2F<sub>c</sub><sup>2</sup>)/3; for the 'observed' data only, R<sub>1</sub> = 0.037.

In the final difference map, the highest peak (*ca* 0.7 eÅ<sup>-3</sup>) was close to Cl(2).

Scattering factors for neutral atoms were taken from reference (3). Computer programs used in this analysis have been noted above, and were run through WinGX (4) on a Dell Precision 370 PC at the University of East Anglia.

## References

1. Programs CrysAlis-CCD and -RED, Oxford Diffraction Ltd., Abingdon, UK (2005).
2. G. M. Sheldrick, SHELX-97 - Programs for crystal structure determination (SHELXS) and refinement (SHELXL), *Acta Crystallogr.*, (2008), A64, 112-122.
3. 'International Tables for X-ray Crystallography', Kluwer Academic Publishers, Dordrecht (1992). Vol. C, pp. 500, 219 and 193.
4. L. J. Farrugia, *J. Appl. Cryst.*, (1999) **32**, 837-838.

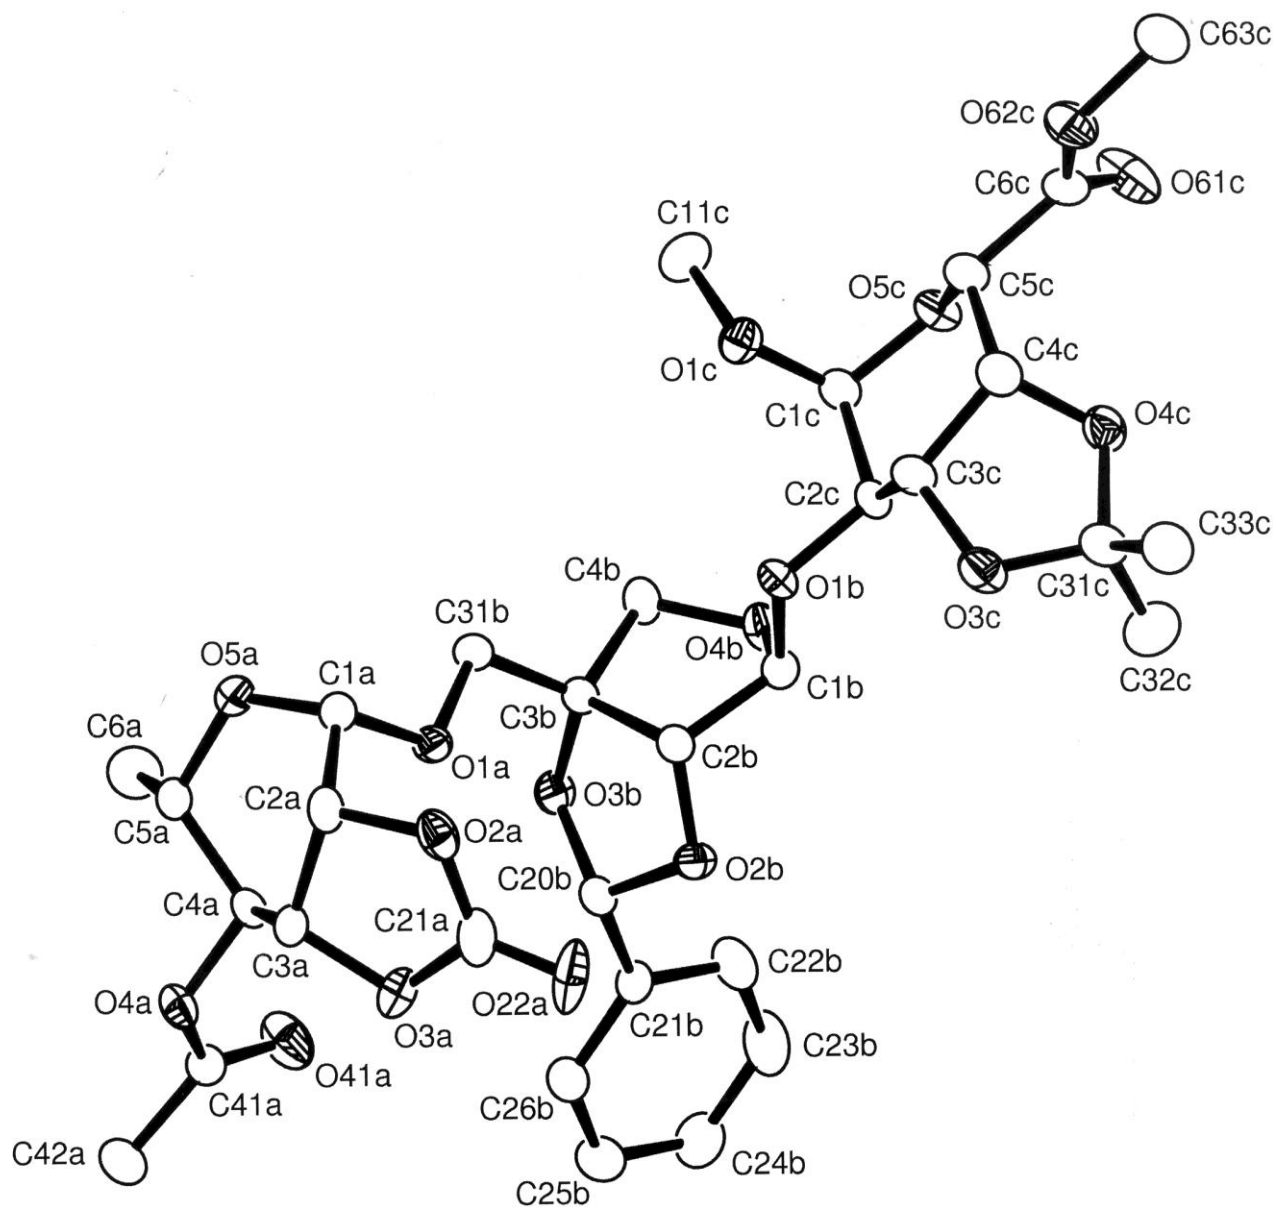

**Fig. 1** X-Ray crystal structure of disaccharide derivative **41**.

# $^1\text{H}$ NMR (400 MHz) and $^{13}\text{C}$ NMR (100 MHz) data for protected saccharide derivatives and oligosaccharides 1–4

## Compound 8

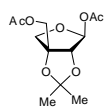

$\text{CDCl}_3$

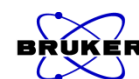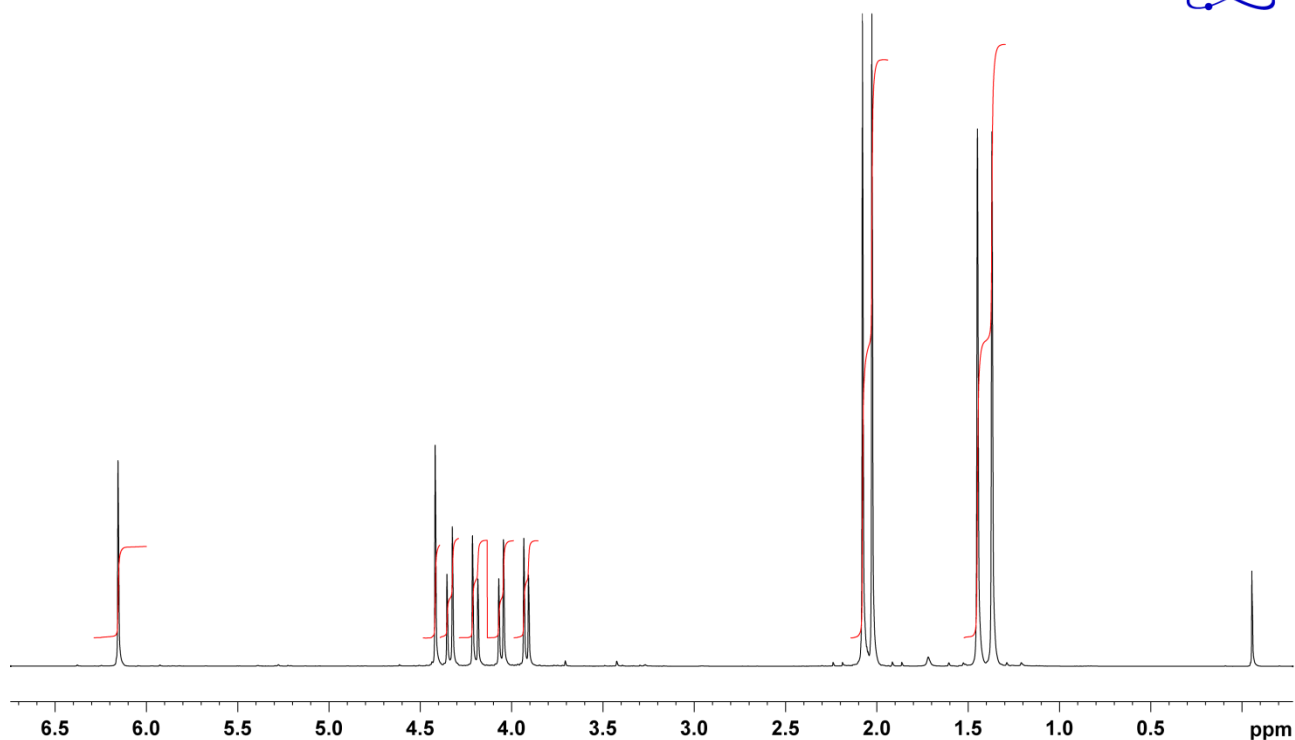

### Compound 9a

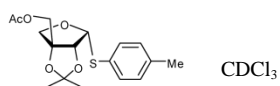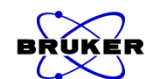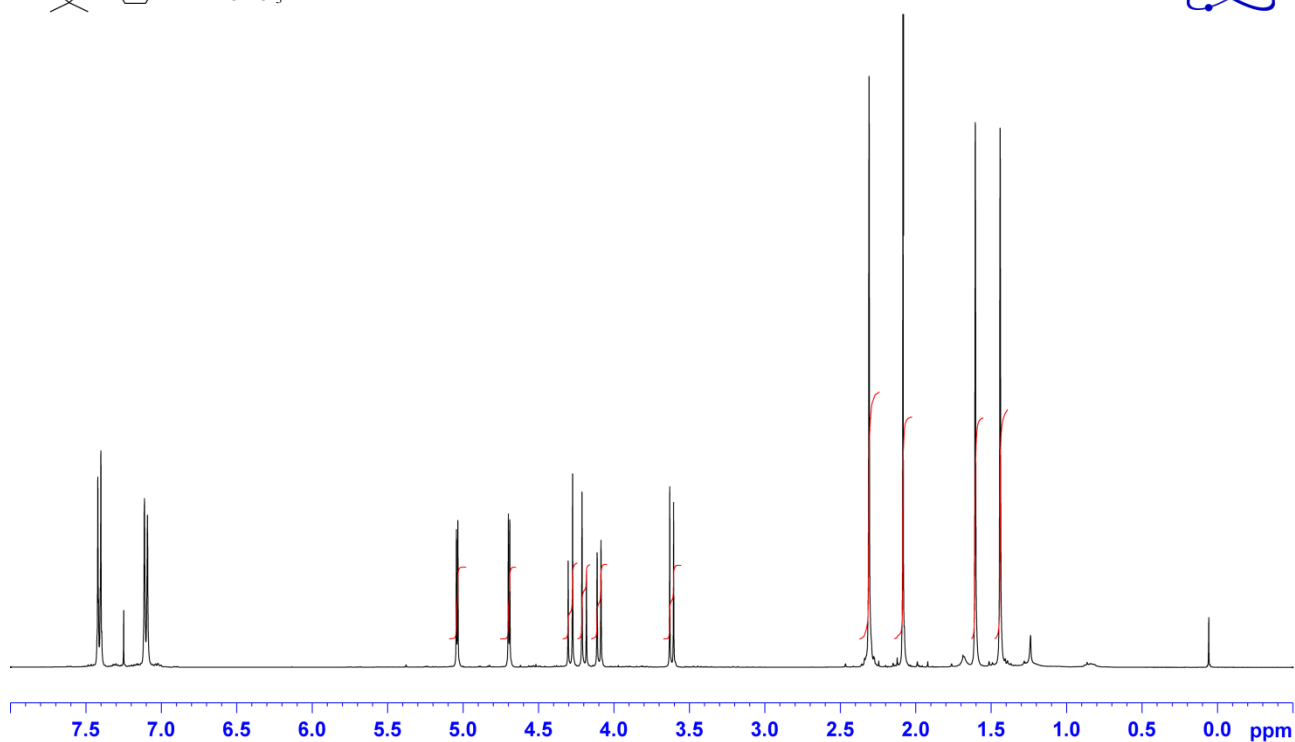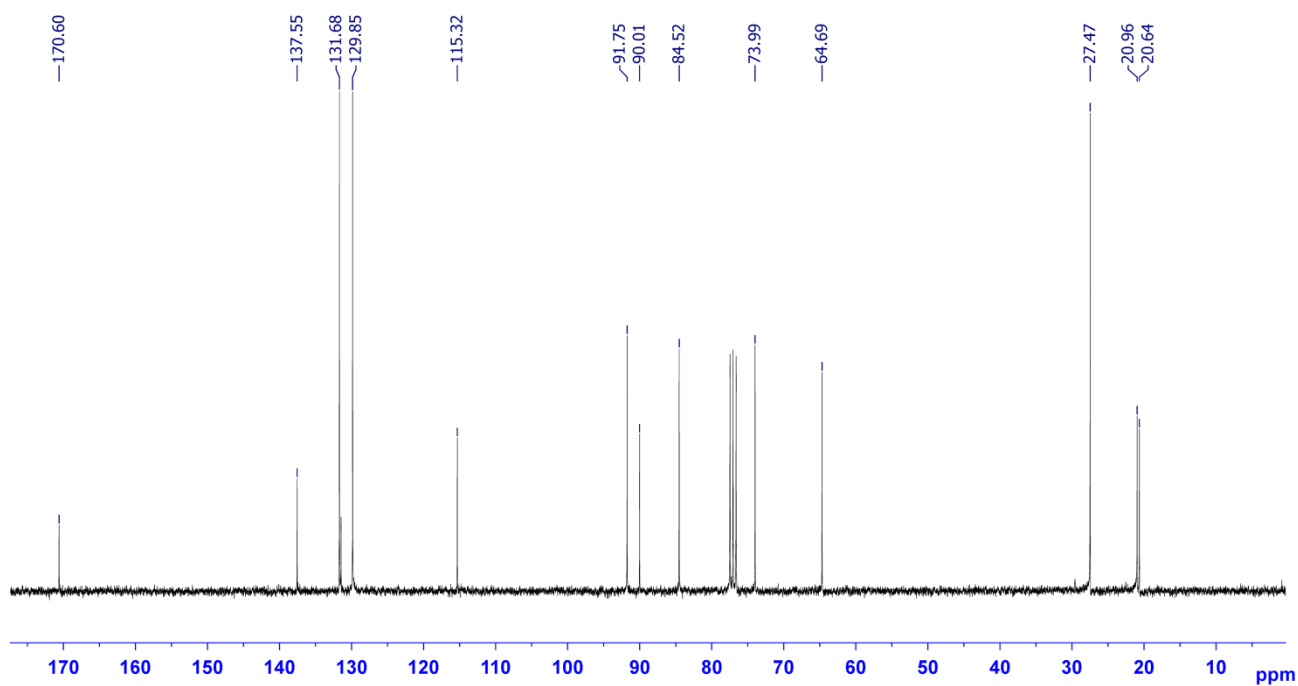

### Compound 9b

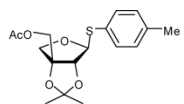

CDCl<sub>3</sub>

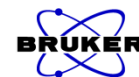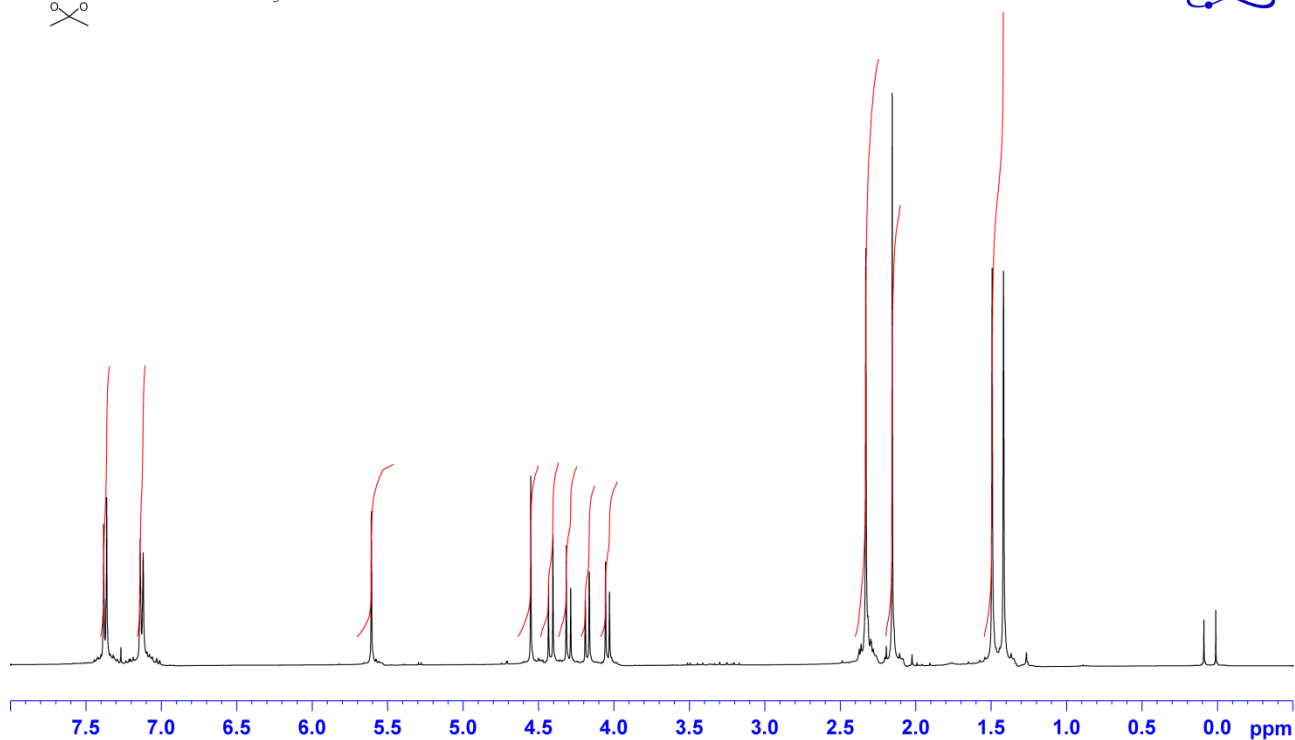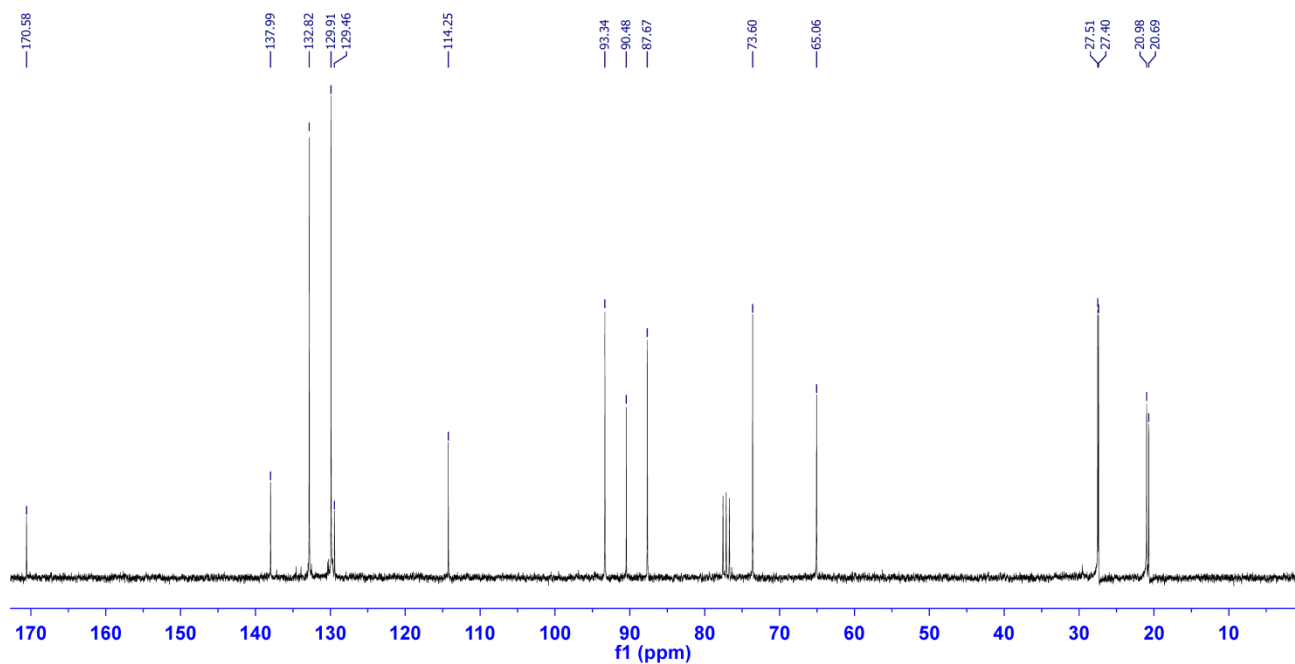

## Compound 12

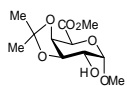

CDCl<sub>3</sub>

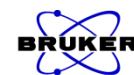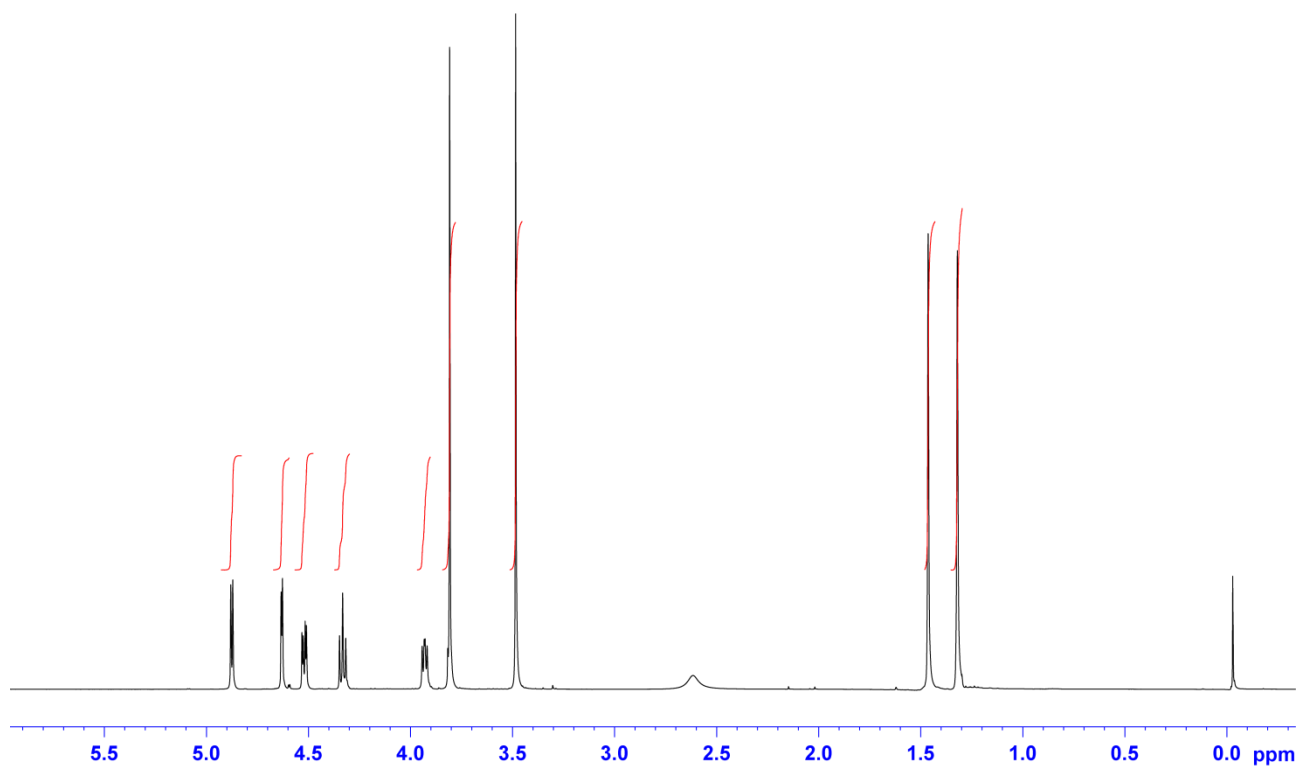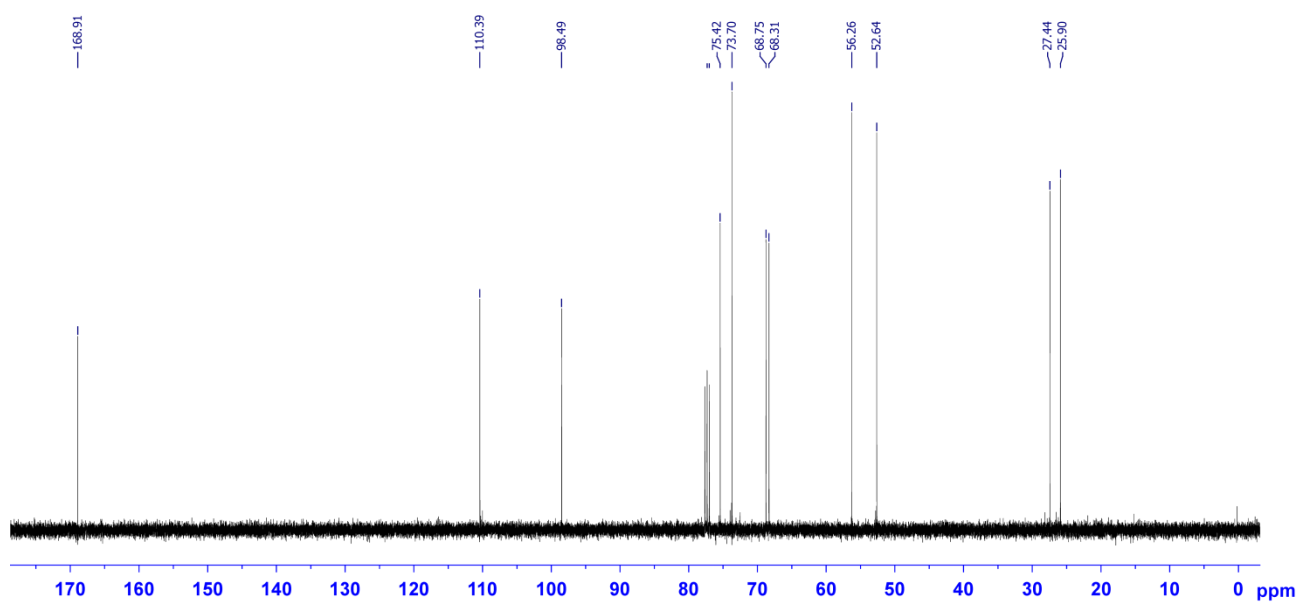



### Compound 13

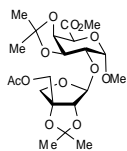

CDCl<sub>3</sub>

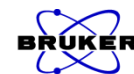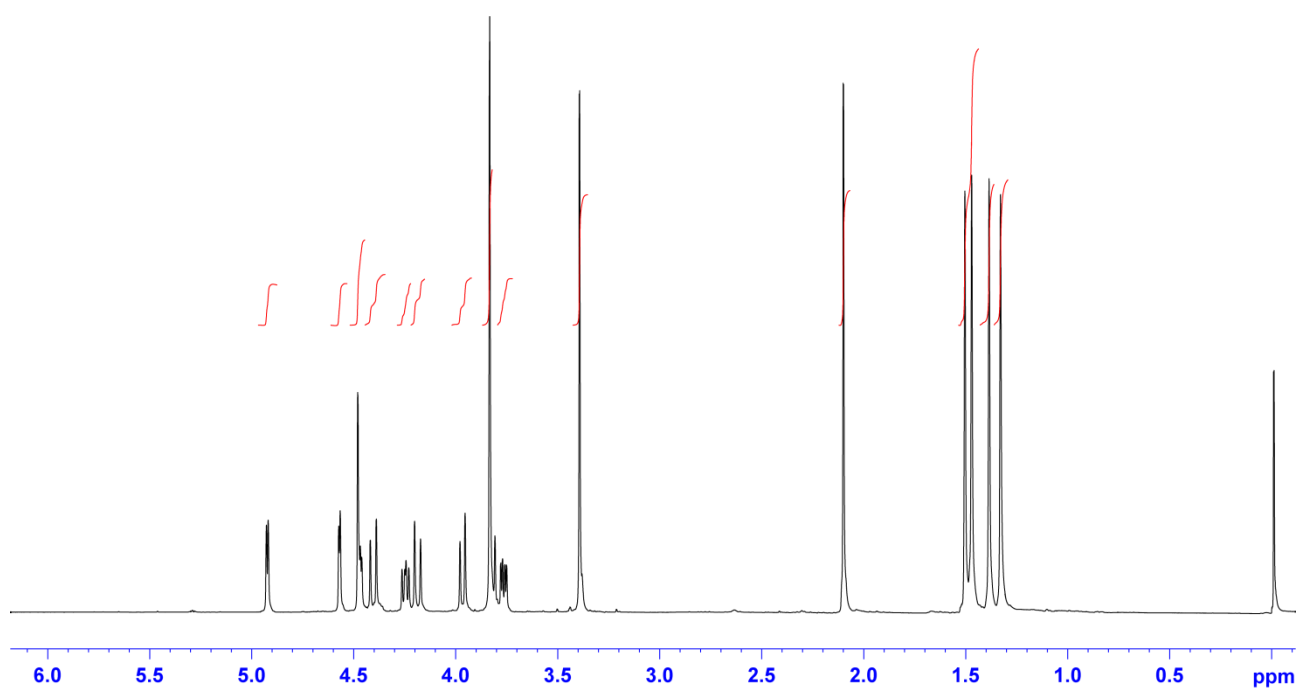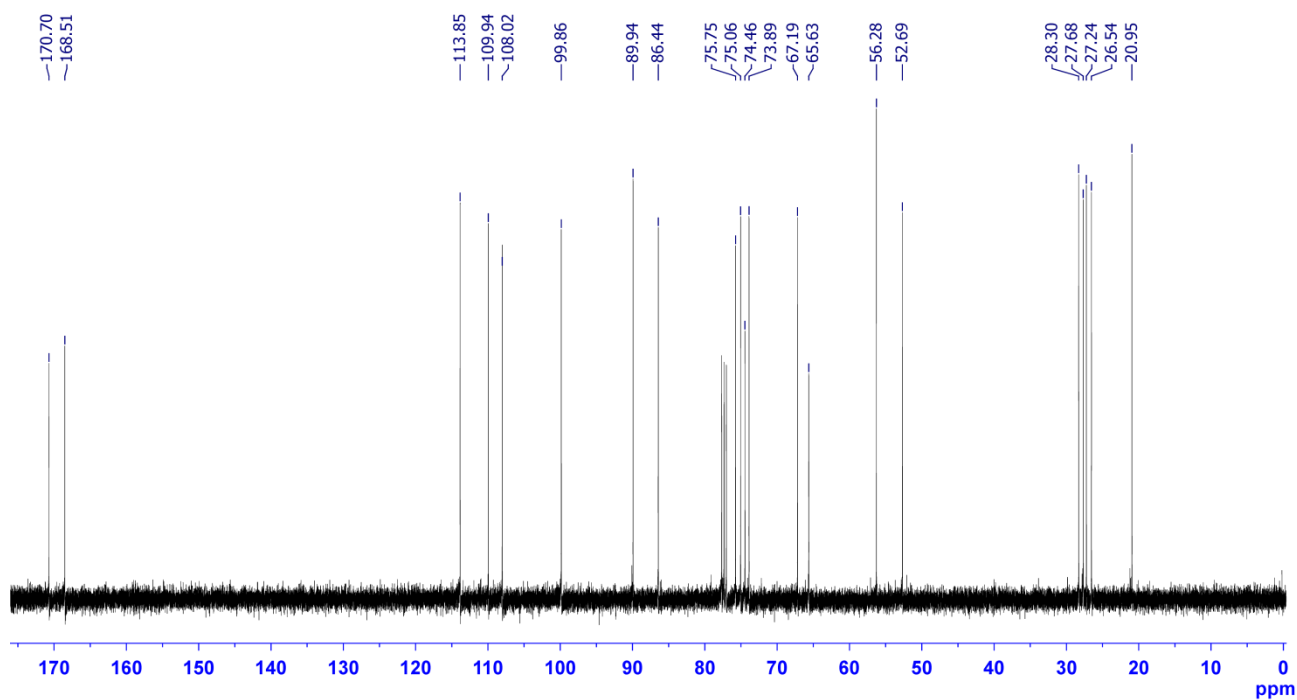

### Compound 14

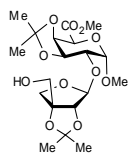

CDCl<sub>3</sub>

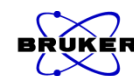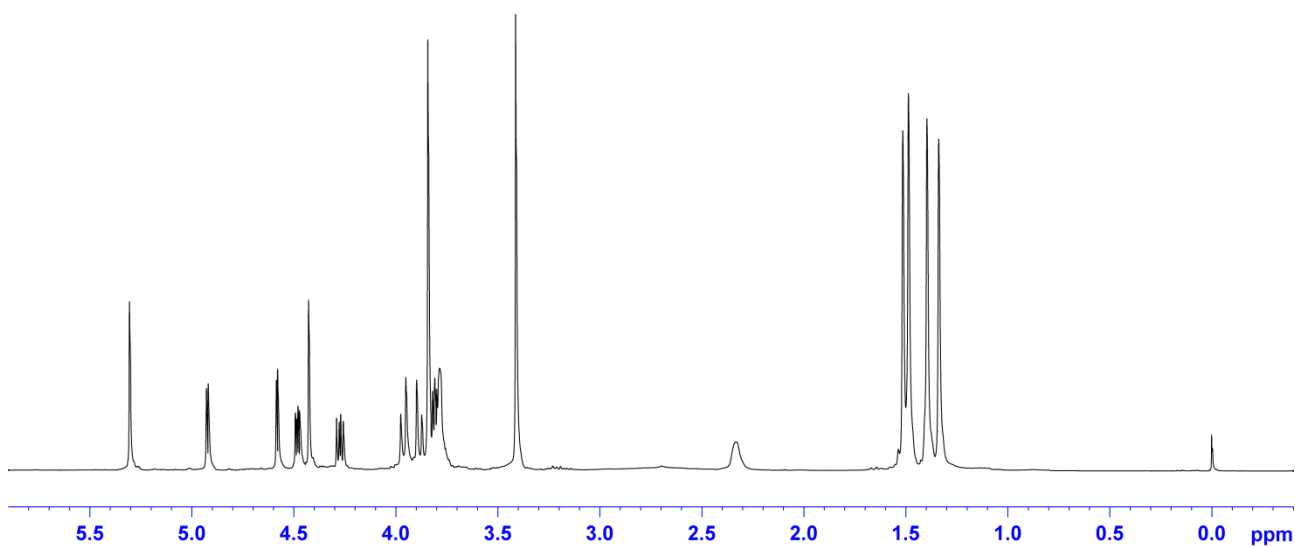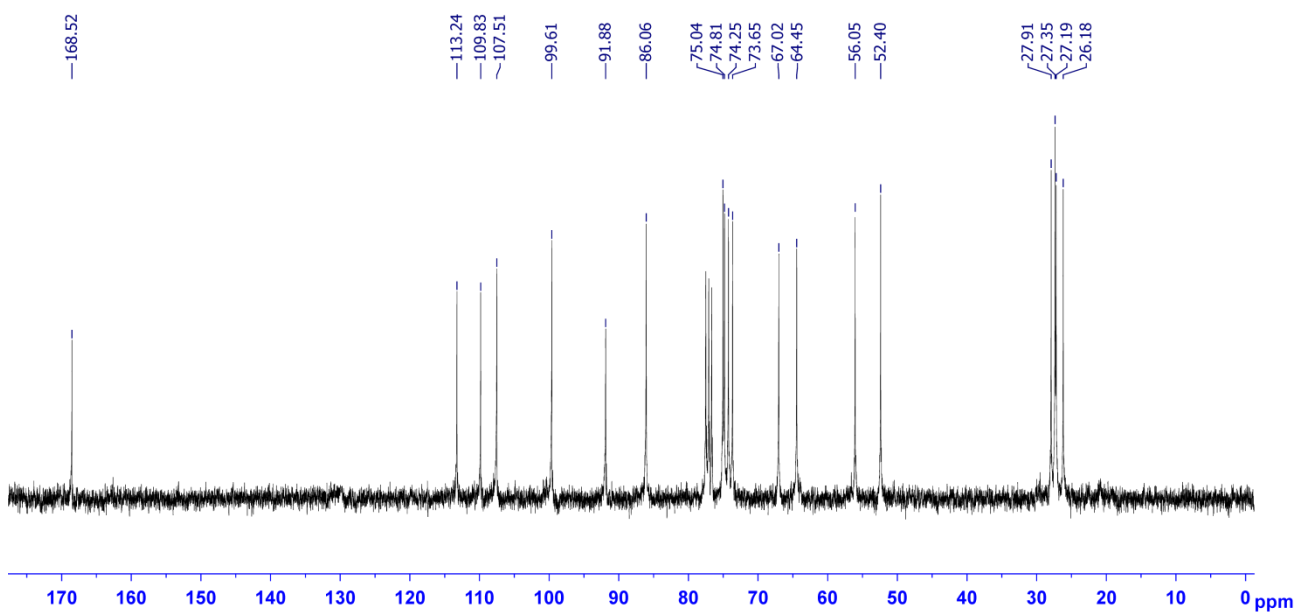

### Compound 16

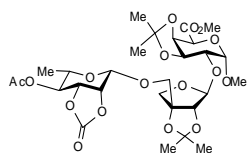

CDCl<sub>3</sub>

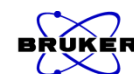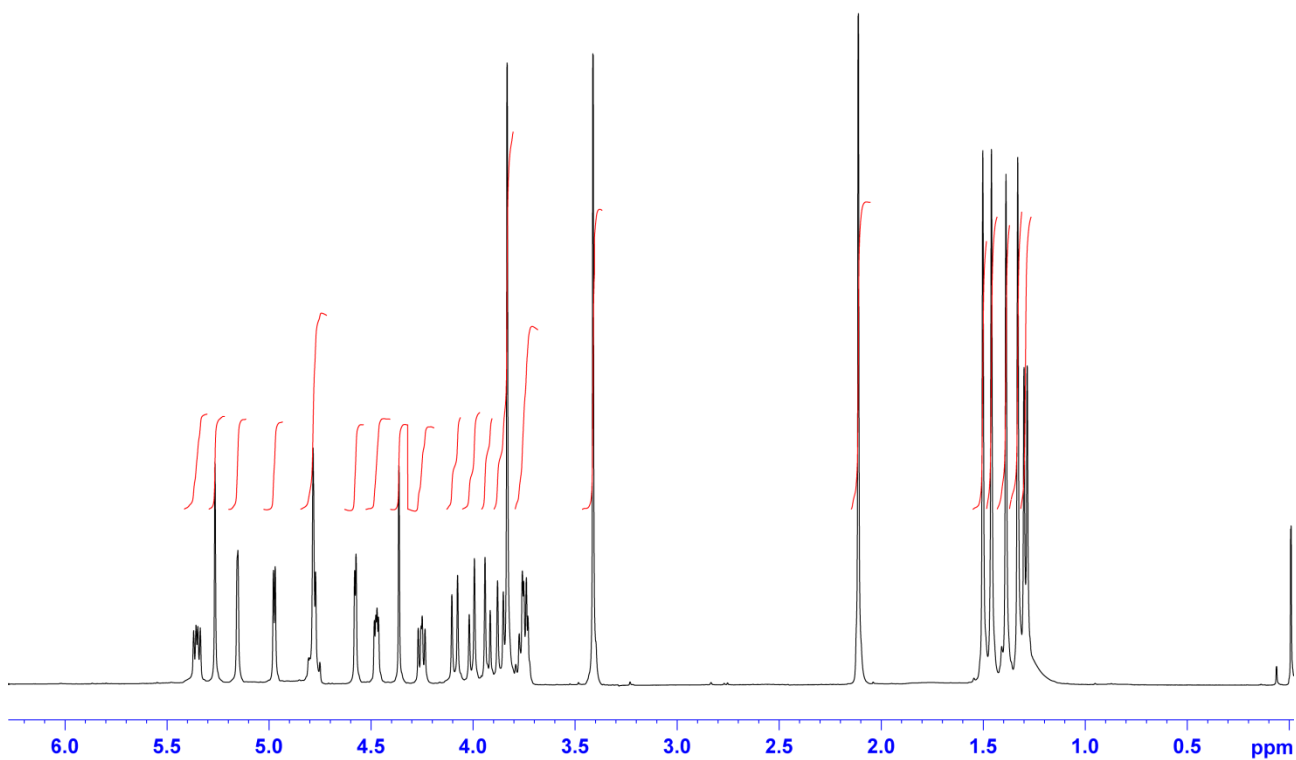

169.29  
168.72  
153.60  
114.05  
110.01  
108.18  
99.91  
95.13  
91.49  
86.33  
76.26  
73.95  
71.38  
70.83  
67.18  
56.42  
52.75  
28.35  
27.74  
27.42  
26.56  
21.02  
19.76

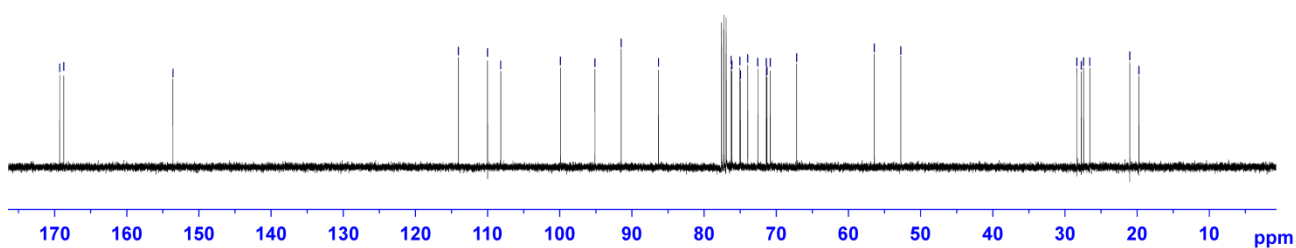

### Compound 17

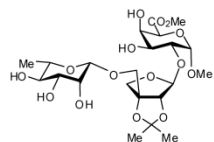

D<sub>2</sub>O

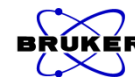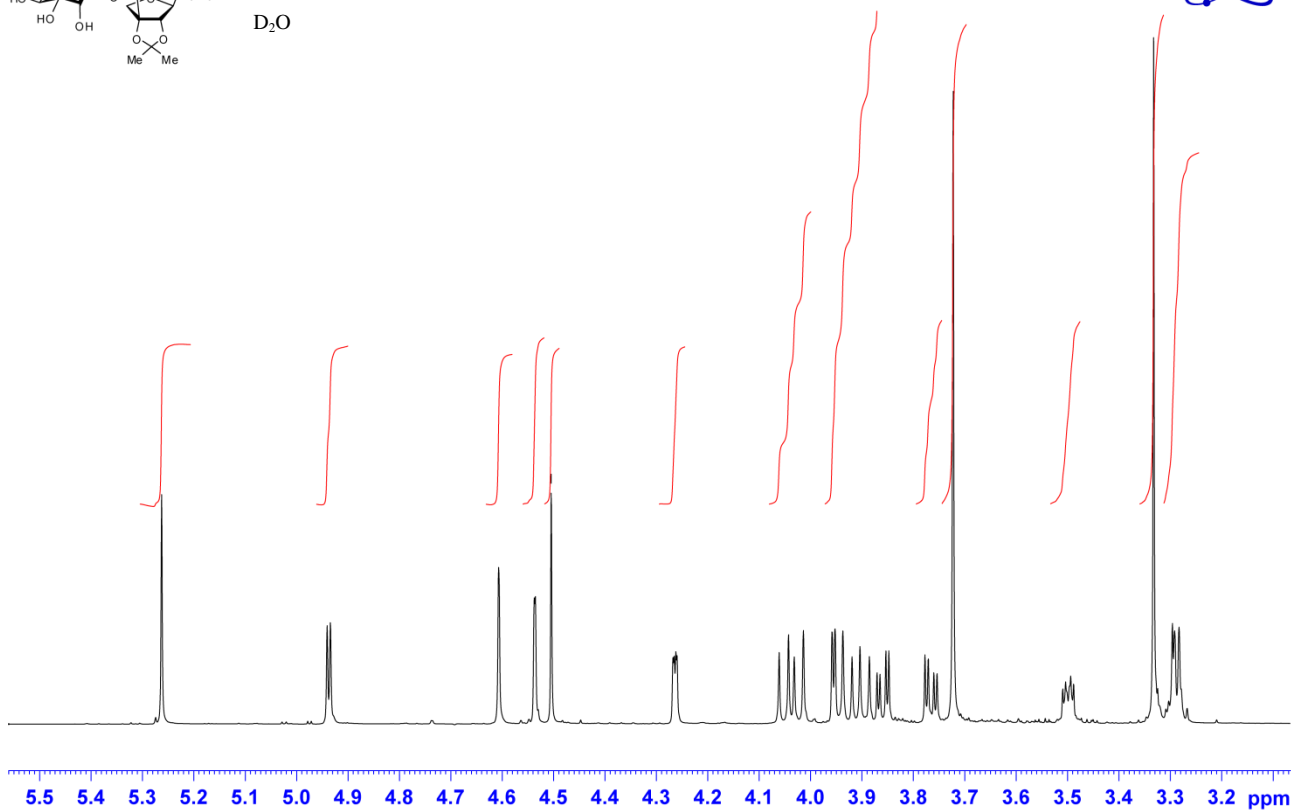

-171.64

-114.66

-109.13

-100.65

-99.51

-91.53

-86.18

-72.64

-72.48

-71.65

-70.87

-70.75

-70.40

-68.15

-55.86

-53.27

-26.88

-26.52

-17.02

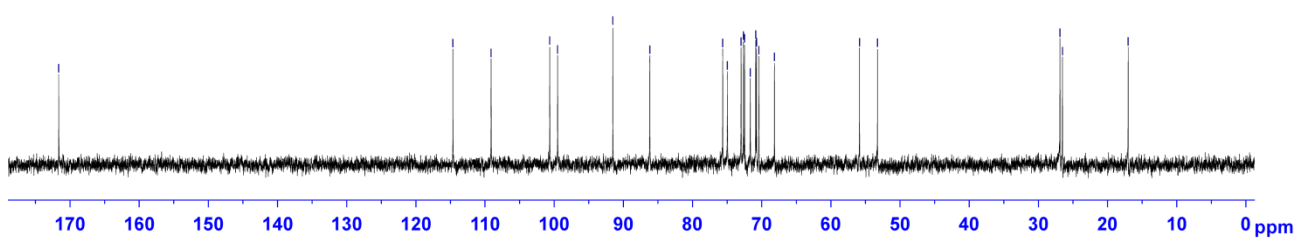

### Compound 22a,b

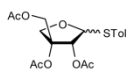

CDCl<sub>3</sub>

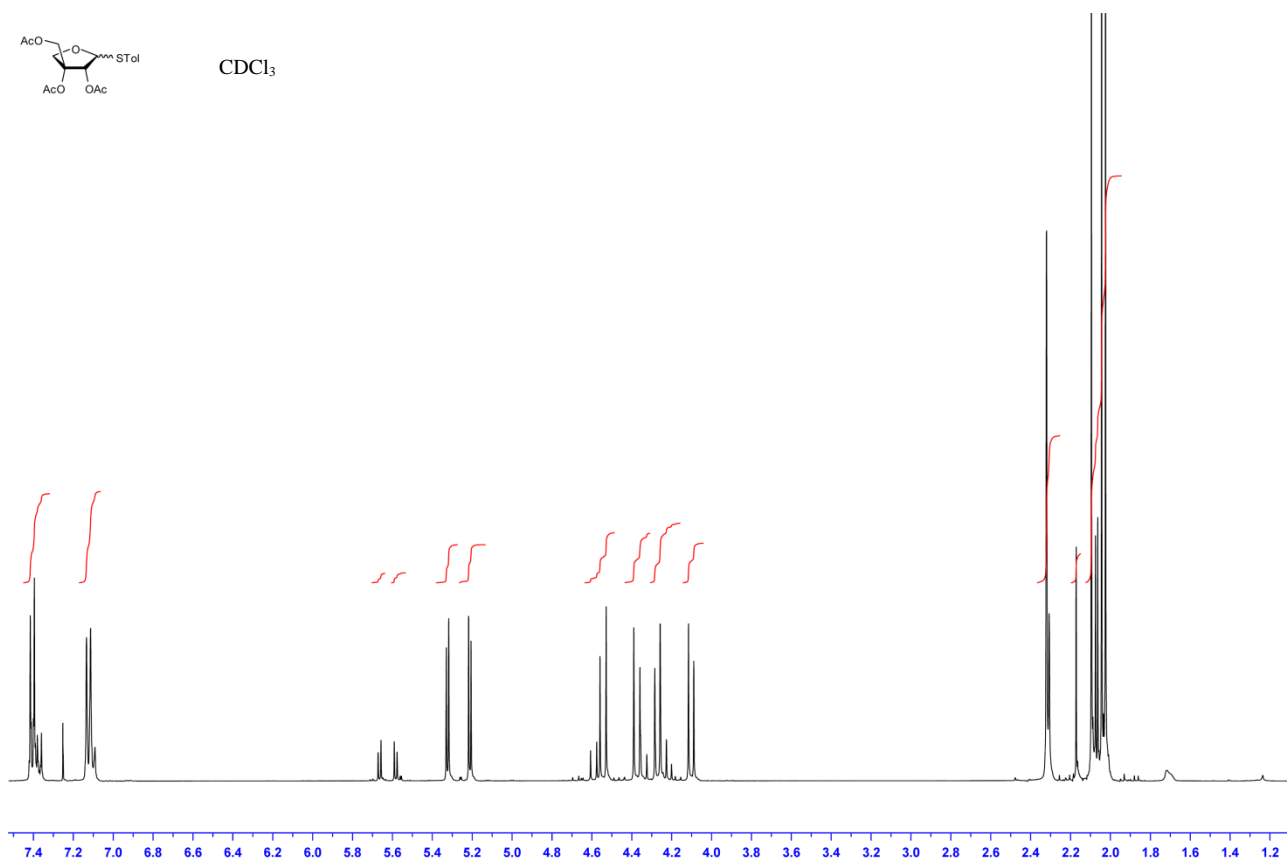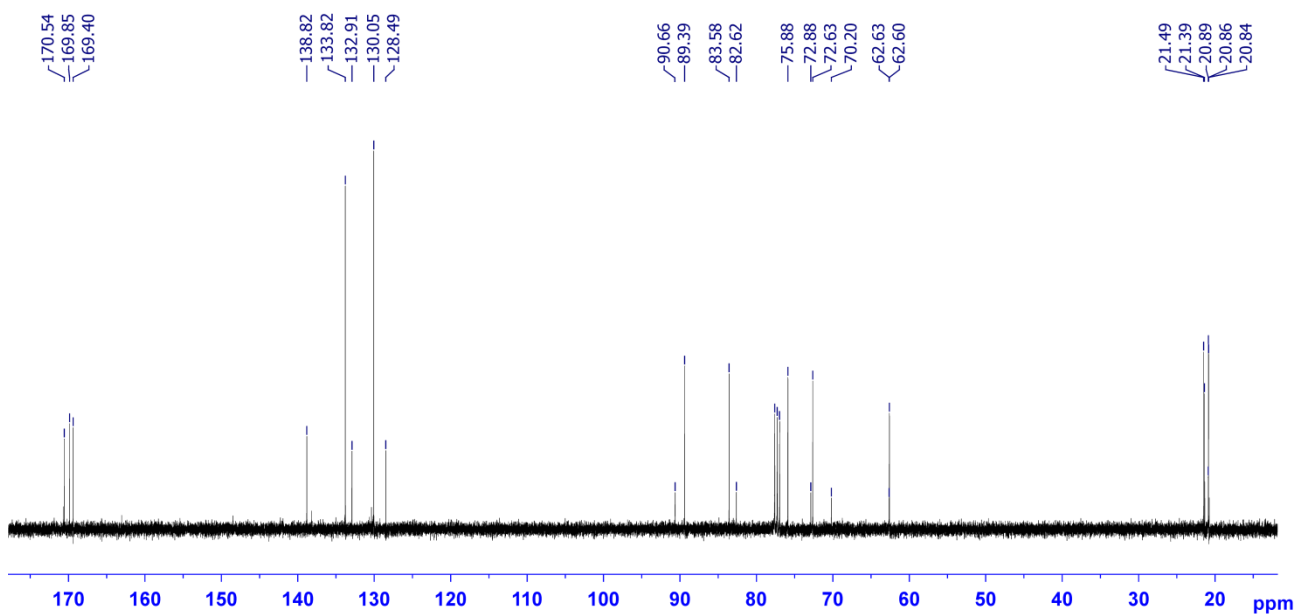

### Compound 23

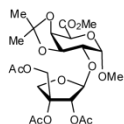

CDCl<sub>3</sub>

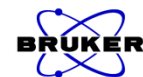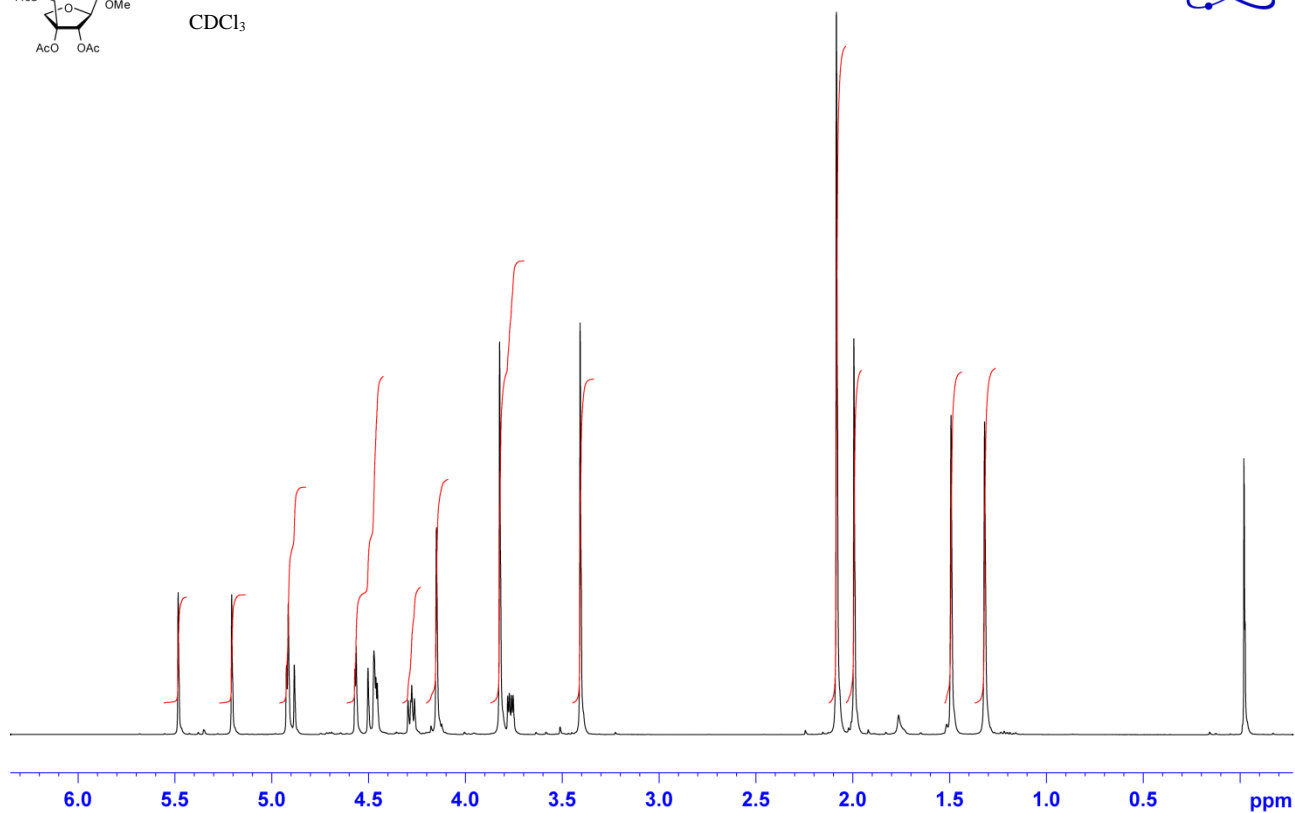

170.61  
169.85  
168.94  
168.42

109.86  
105.76  
99.58

84.10  
77.07  
74.82  
72.50  
67.07  
63.01  
56.21  
52.54

28.06  
26.32  
21.10  
20.73  
20.60

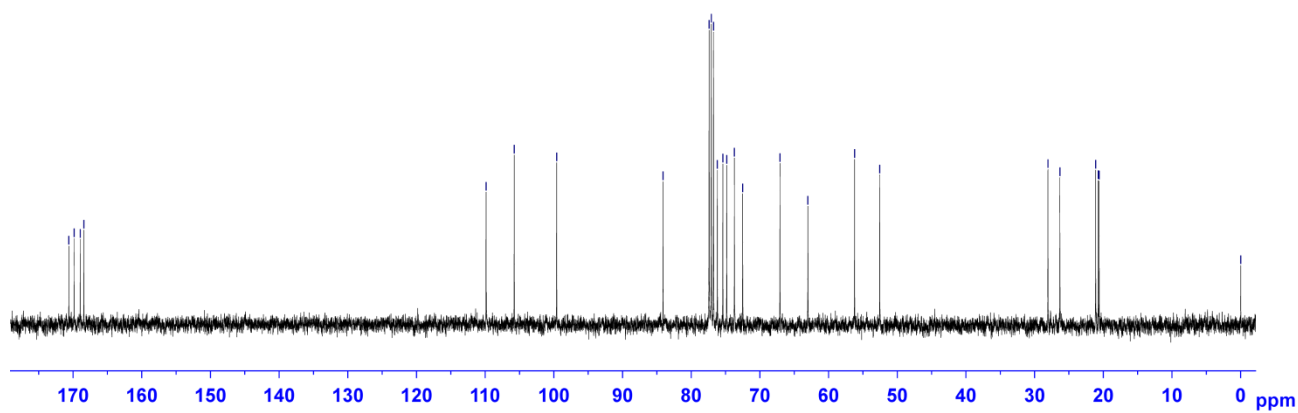

### Compound 24

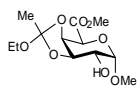

CDCl<sub>3</sub>

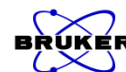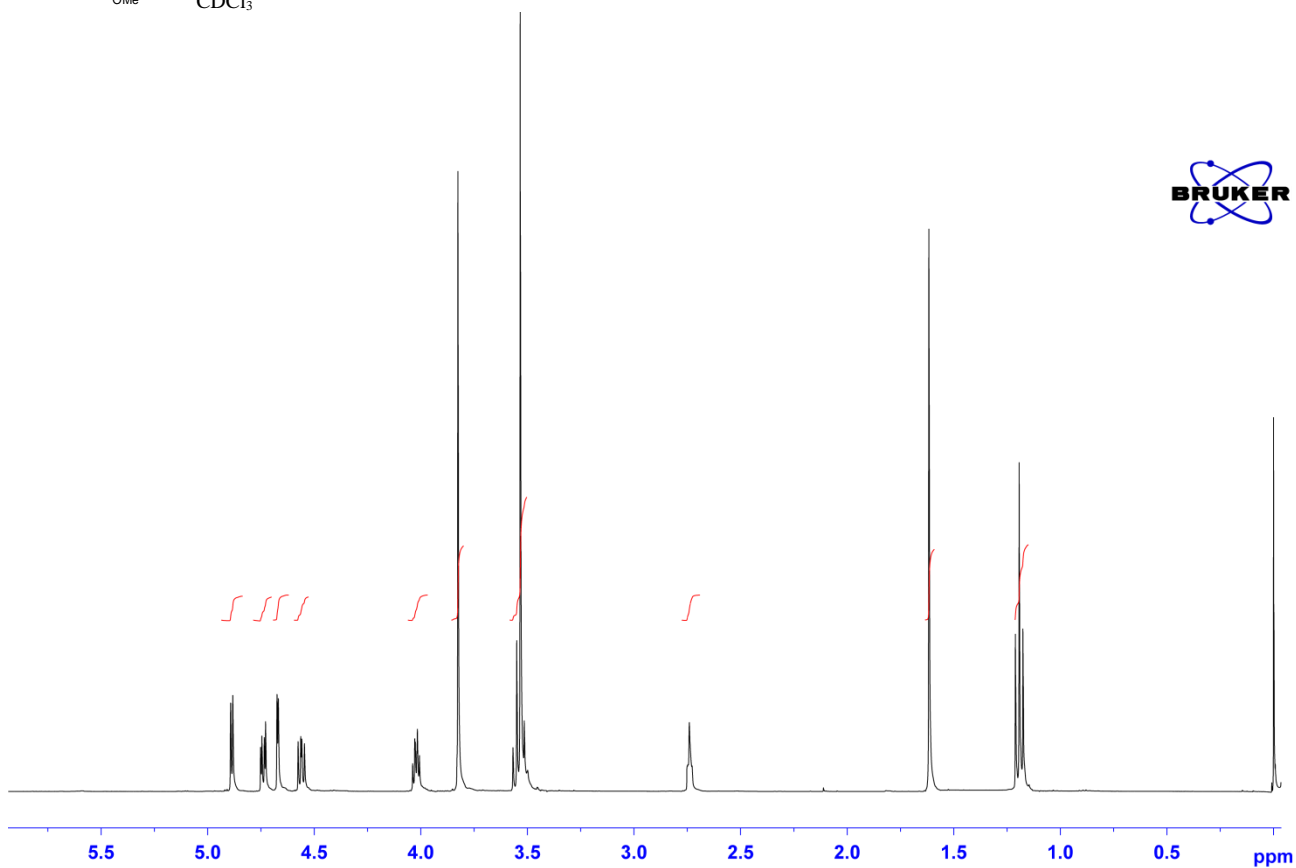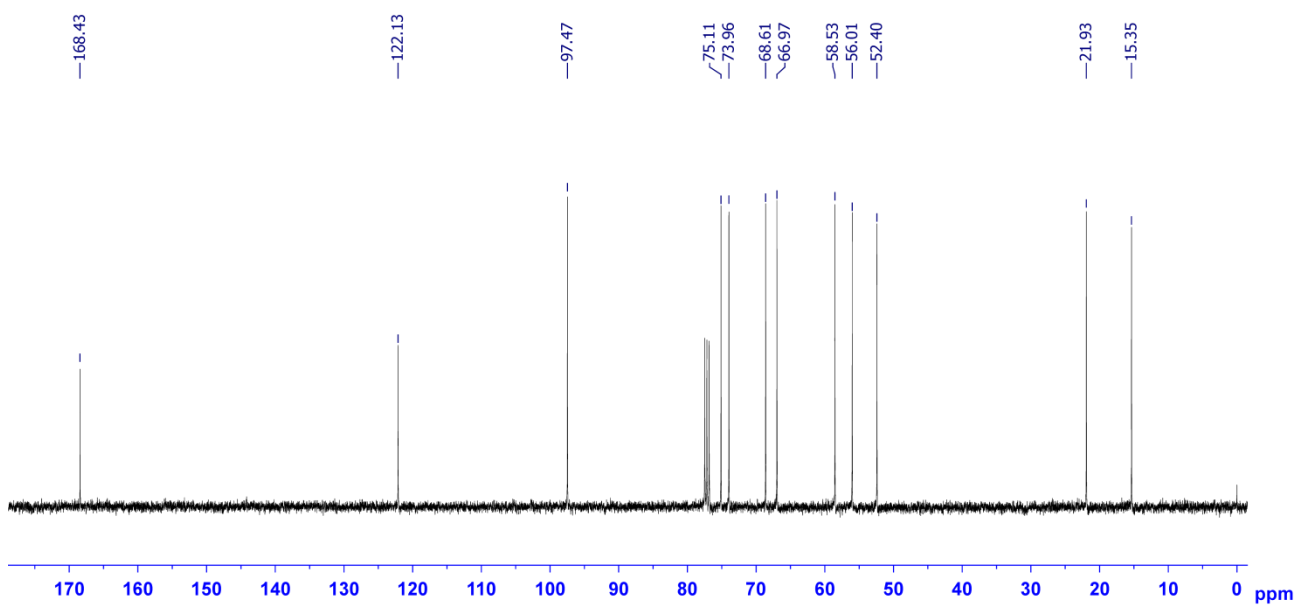

### Compound 25

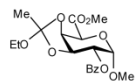

CDCl<sub>3</sub>

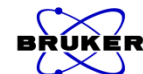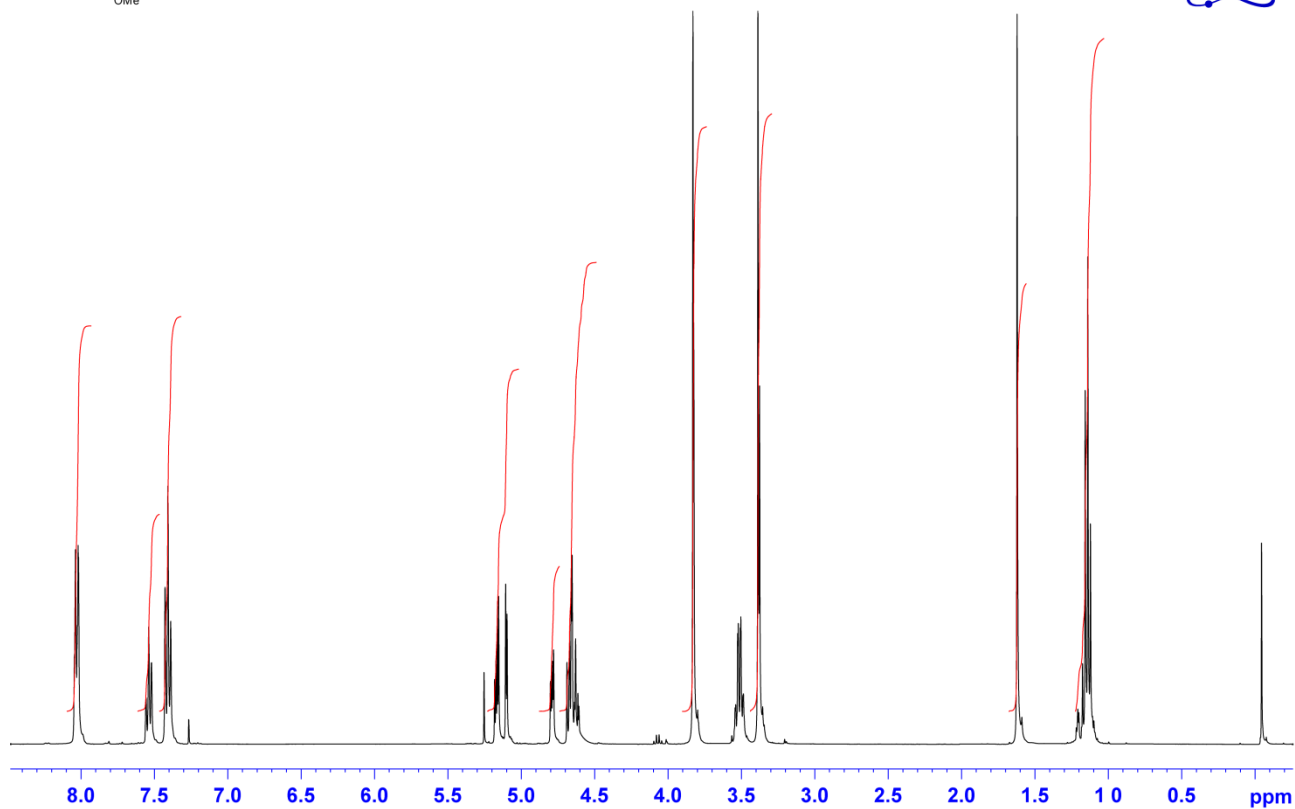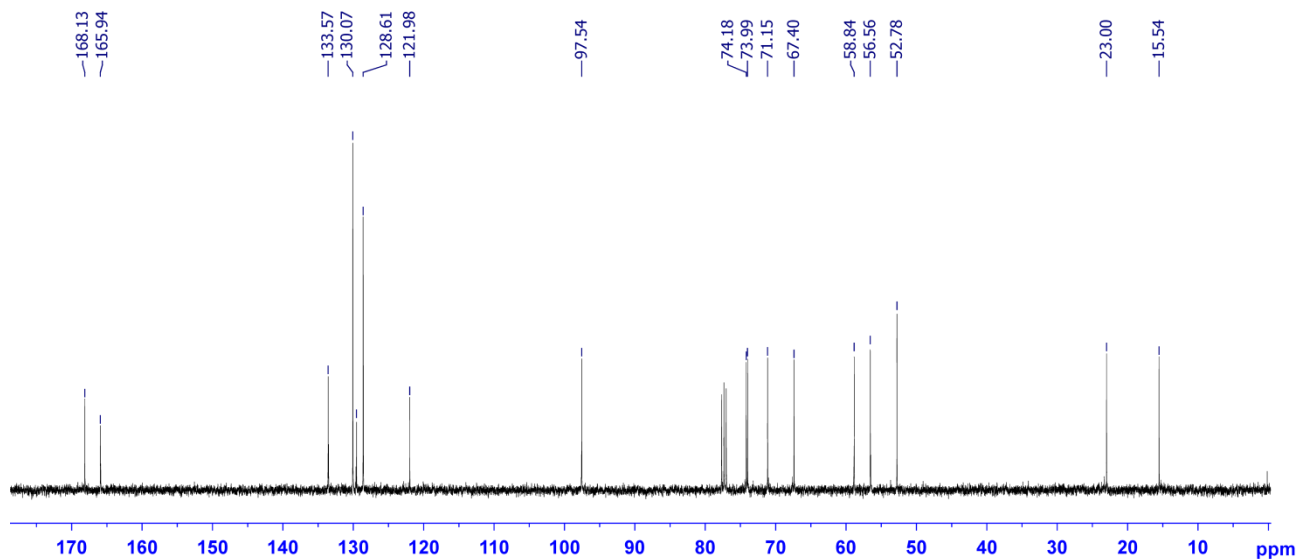



### Compound 26

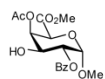

CDCl<sub>3</sub>

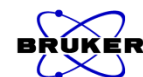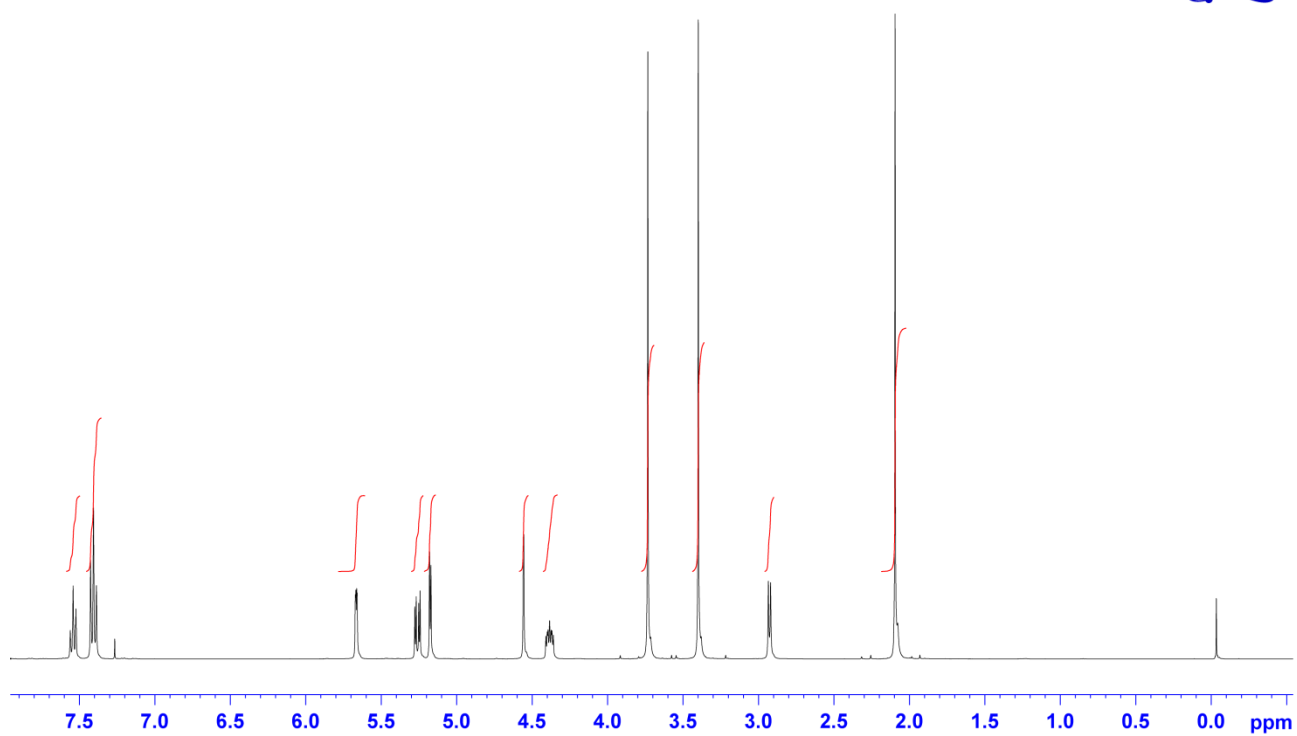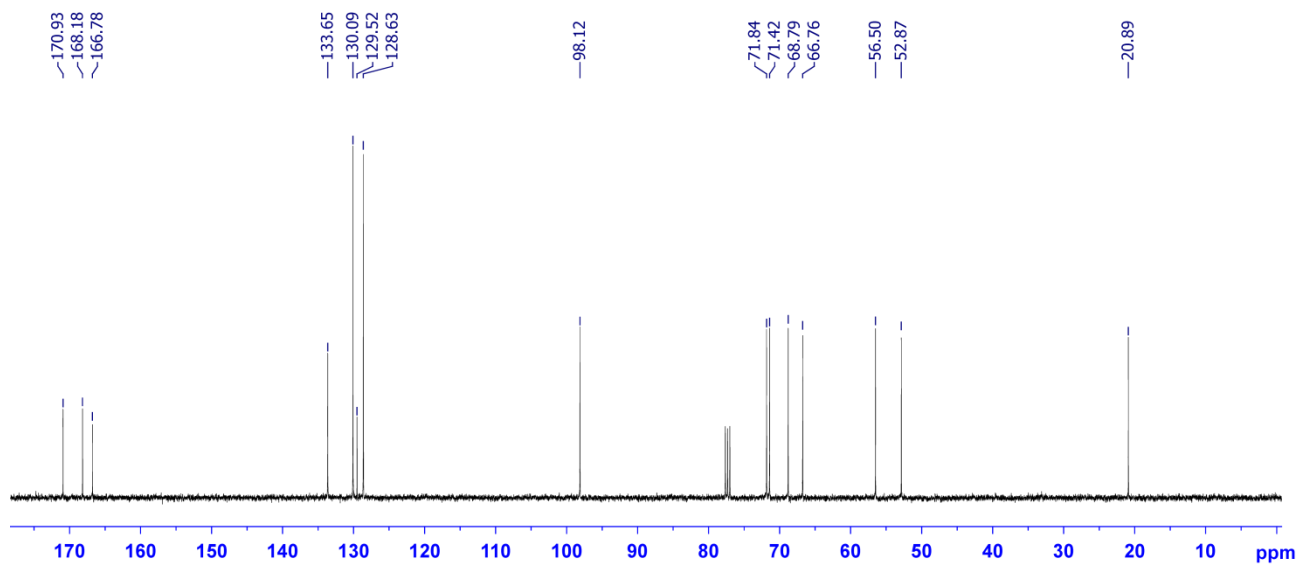

### Compound 27

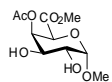

CDCl<sub>3</sub>

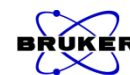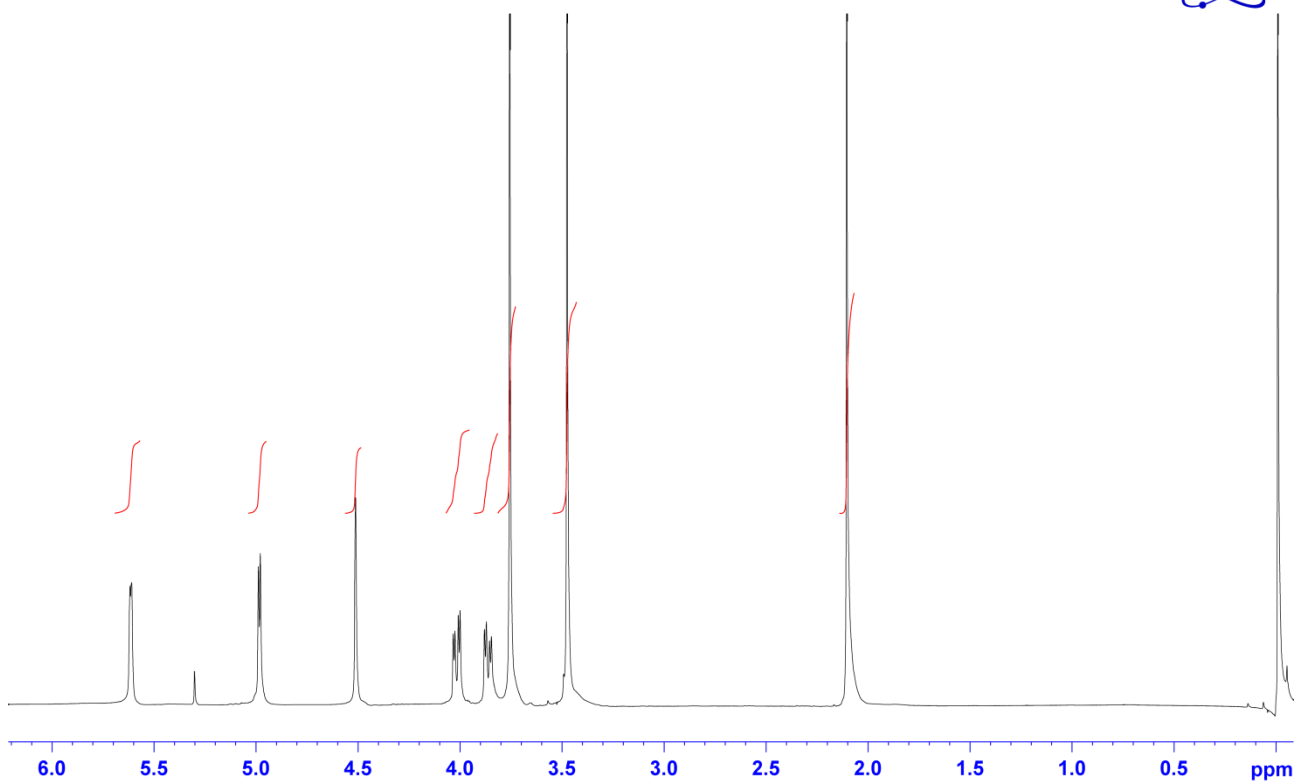

170.44  
168.04

99.84

71.20  
68.56  
68.19  
67.85

55.76  
52.15

20.16

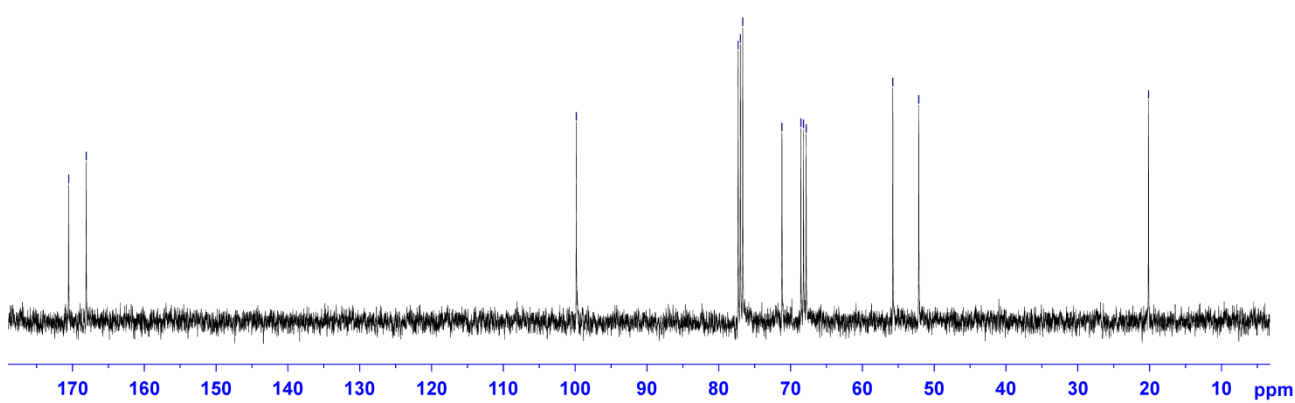

### Compound 28

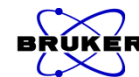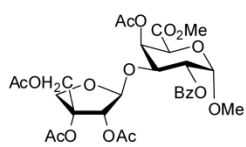

CDCl<sub>3</sub>

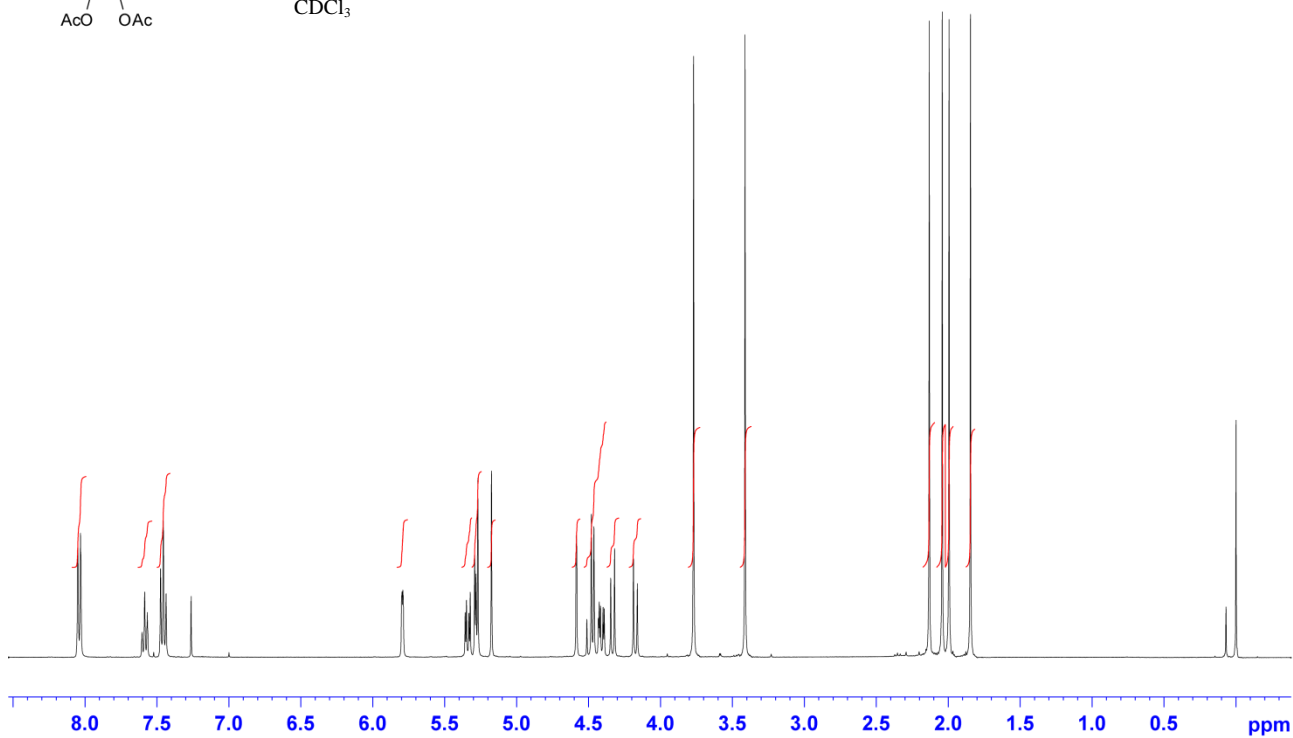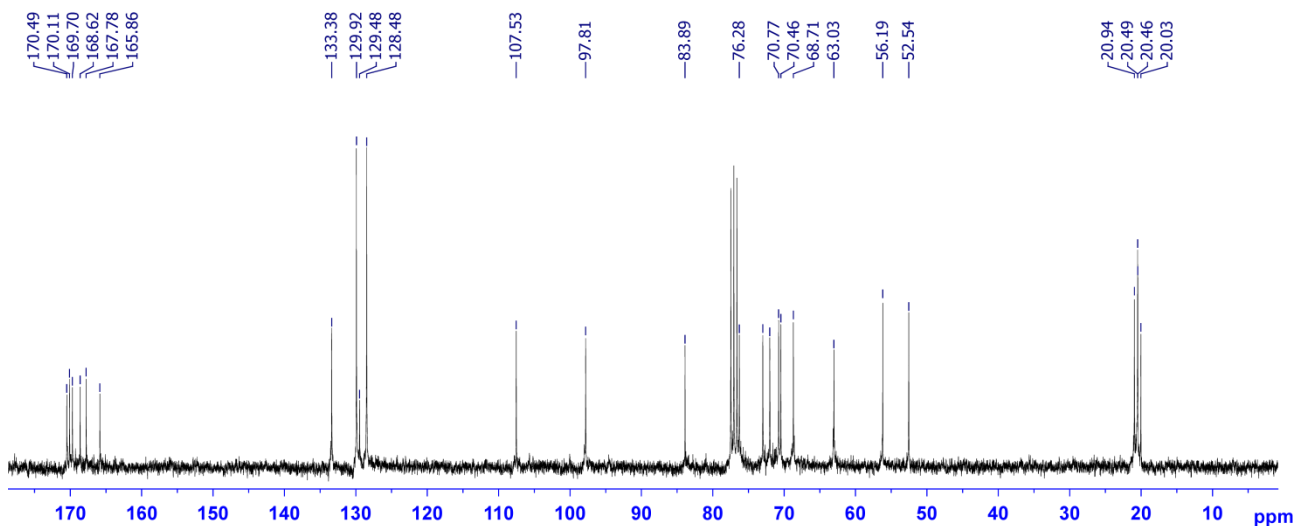

### Compound 29

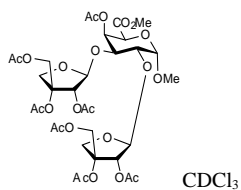

BRUKER

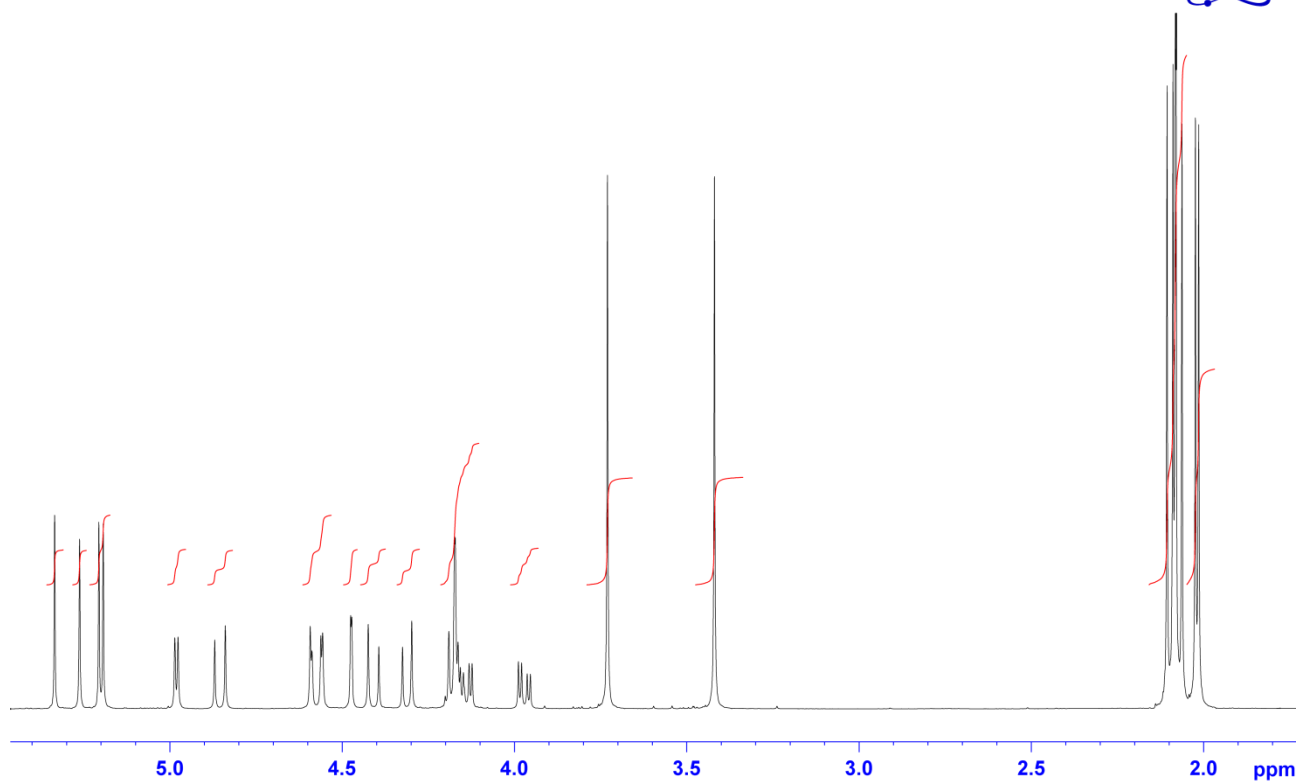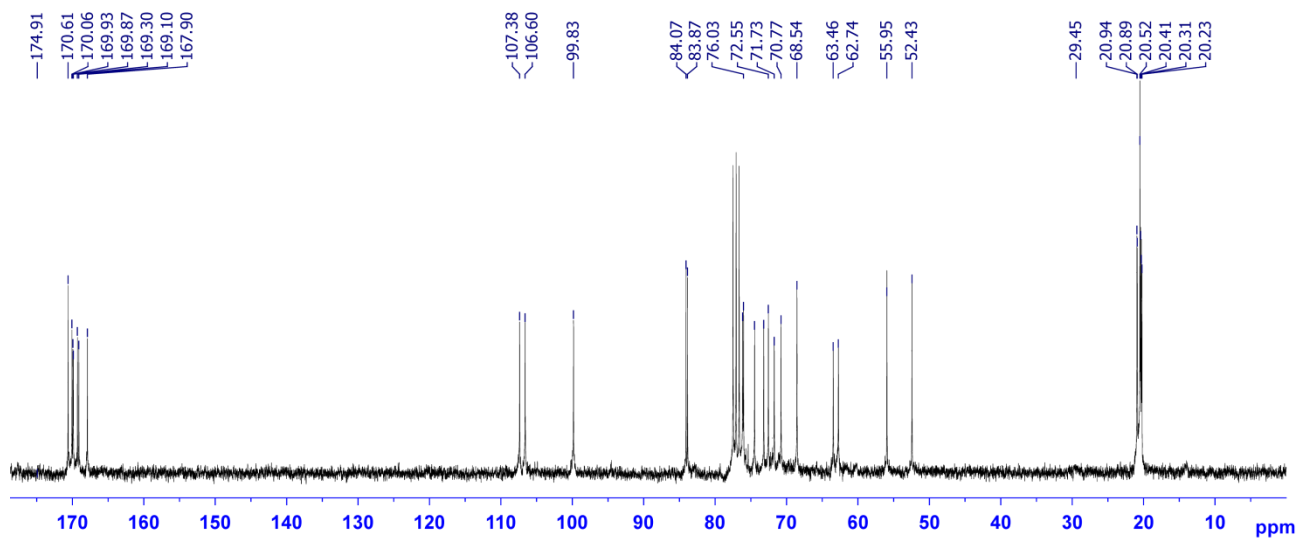

### Compound 30

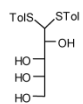

CDCl<sub>3</sub>

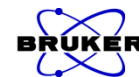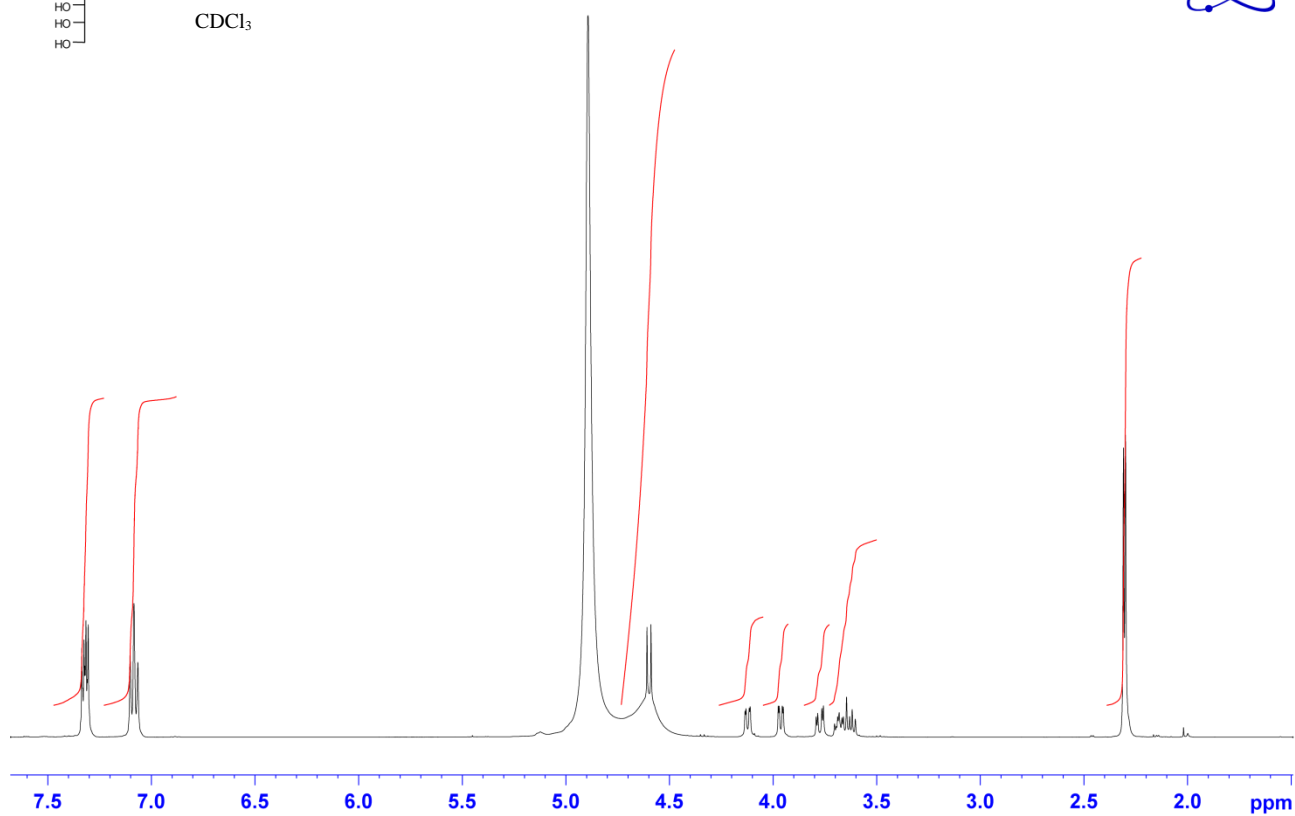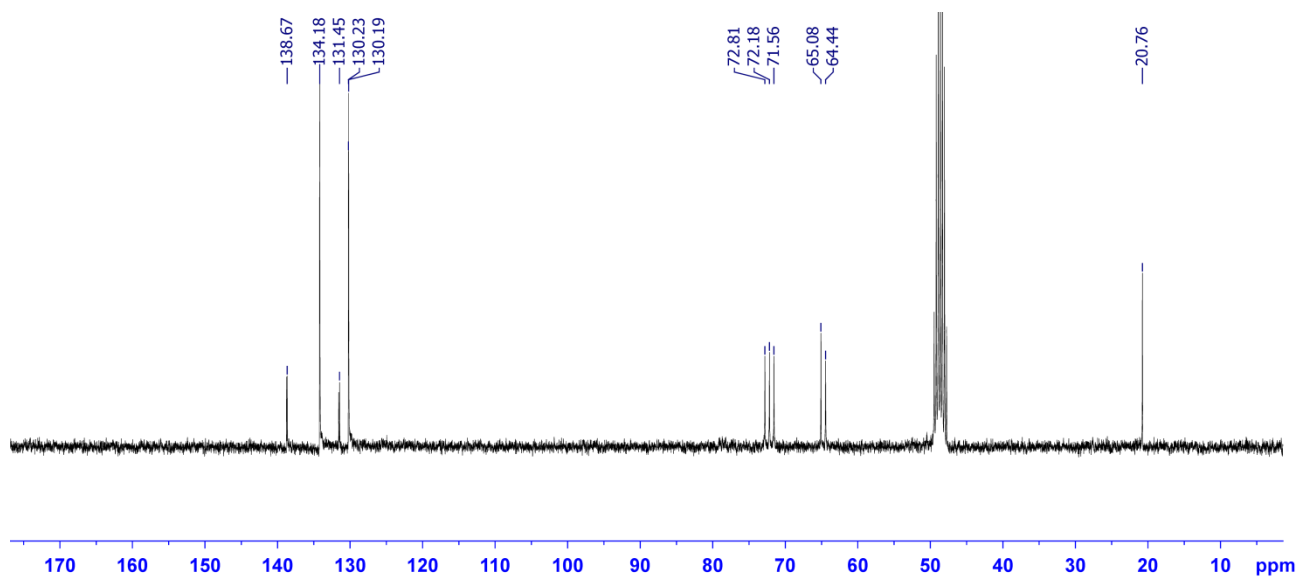

### Compound 31

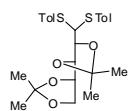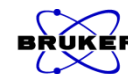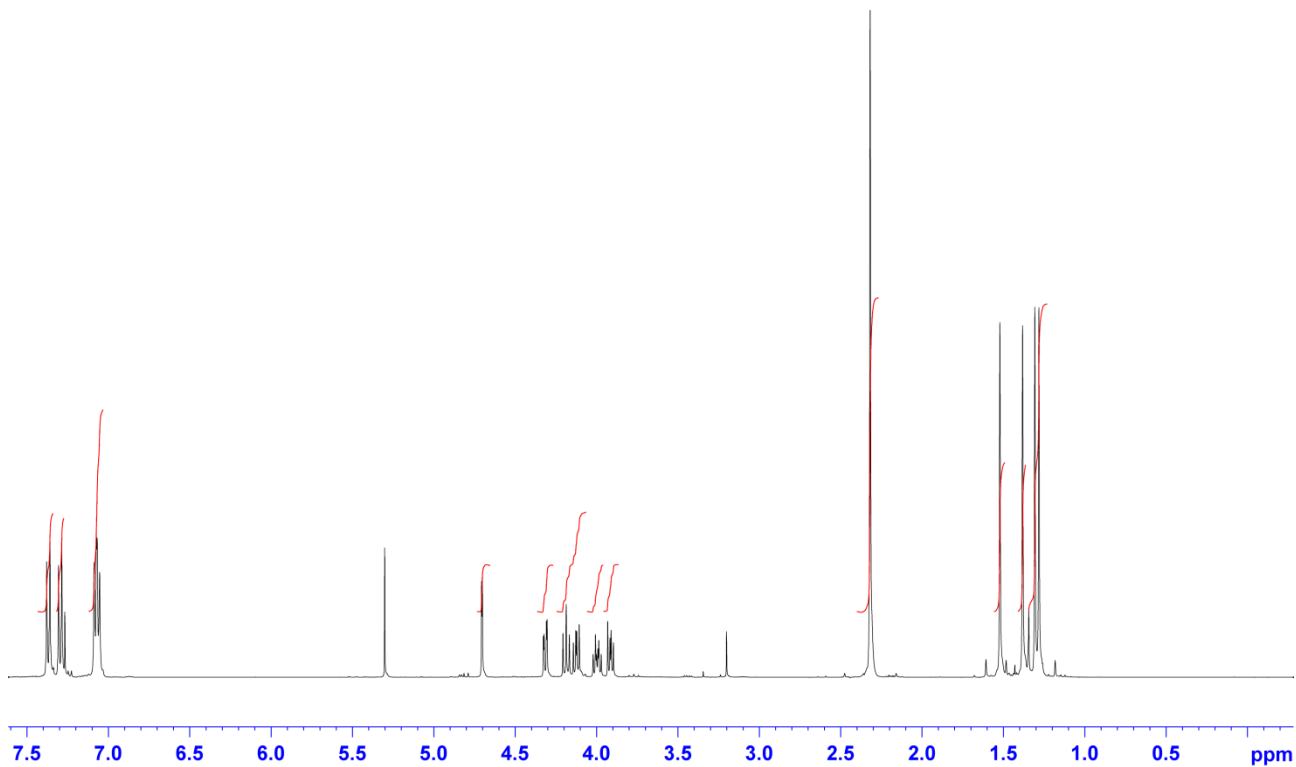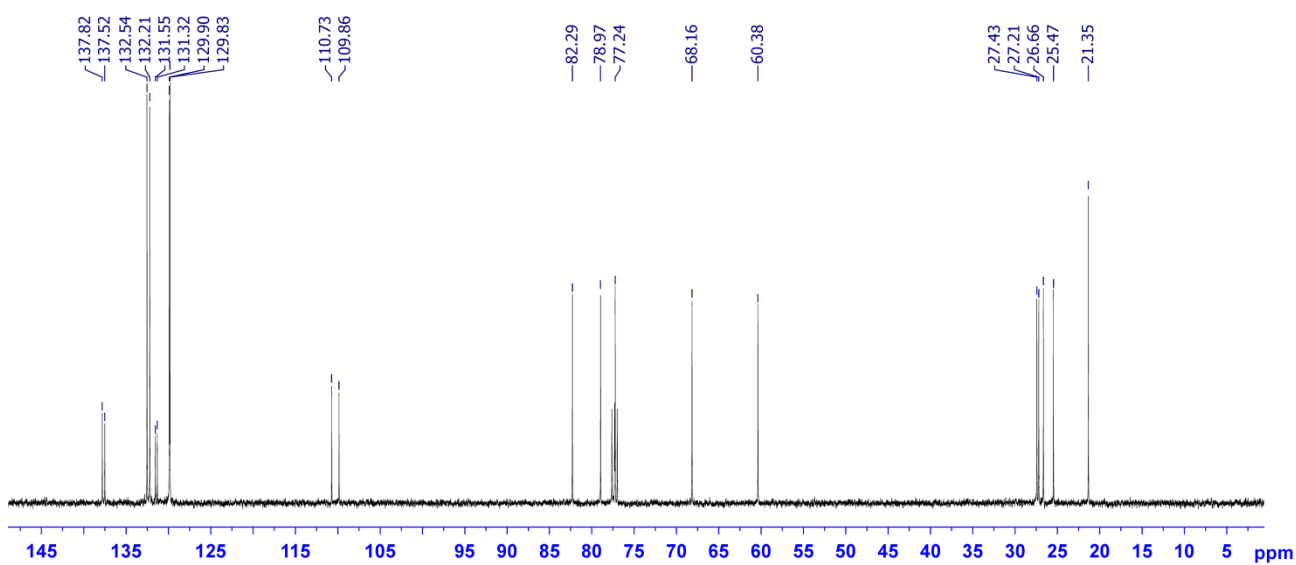

### Compound 32

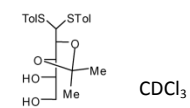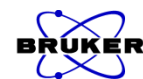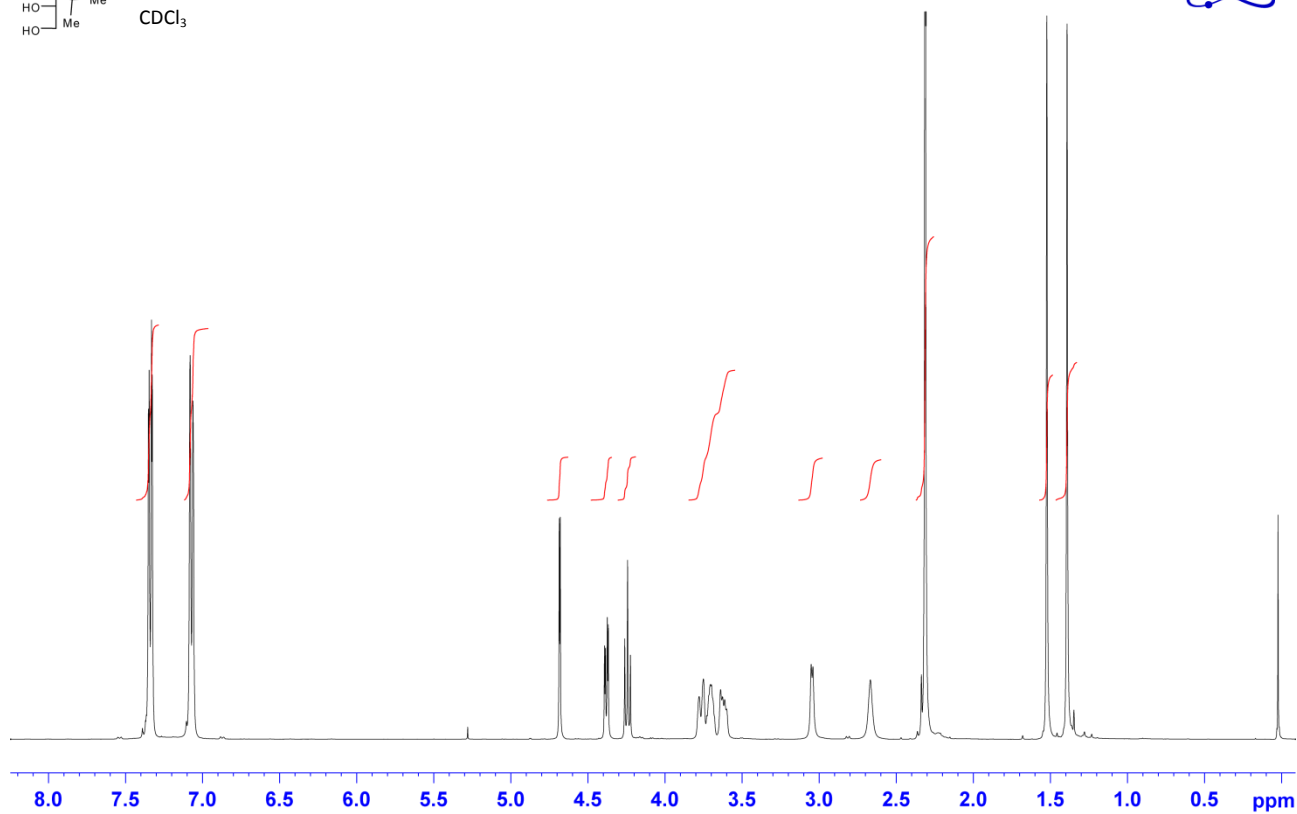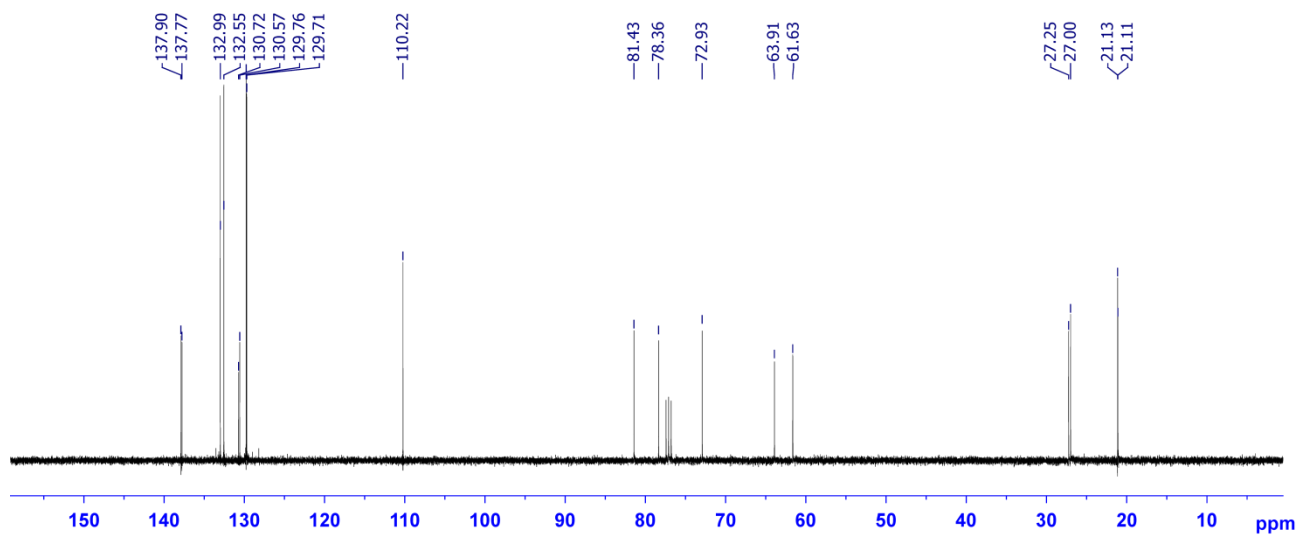

### Compound 33

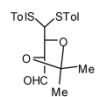

CDCl<sub>3</sub>

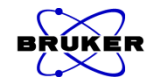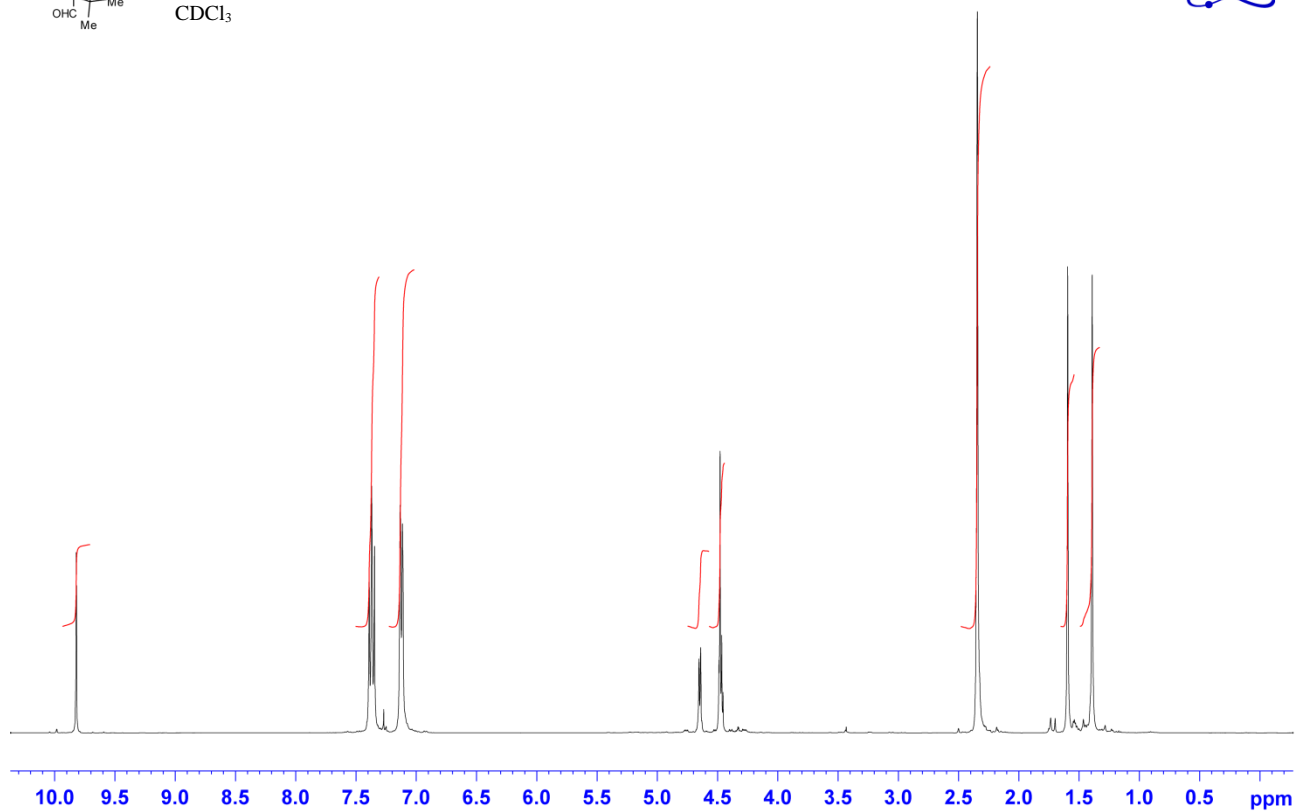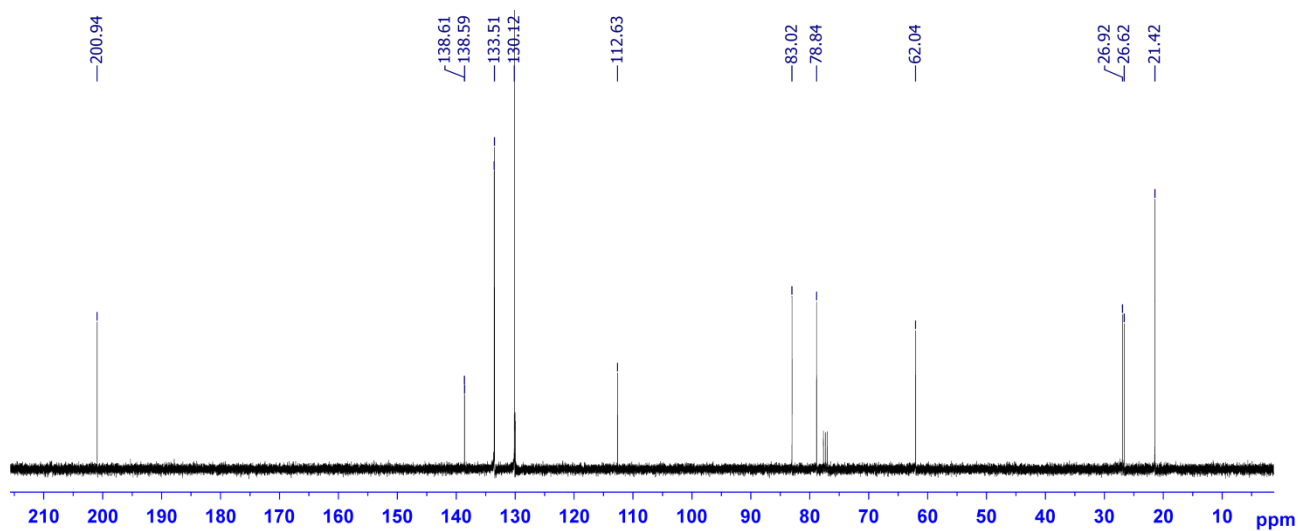



### Compound 34

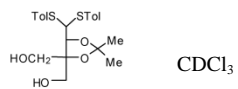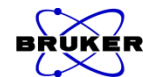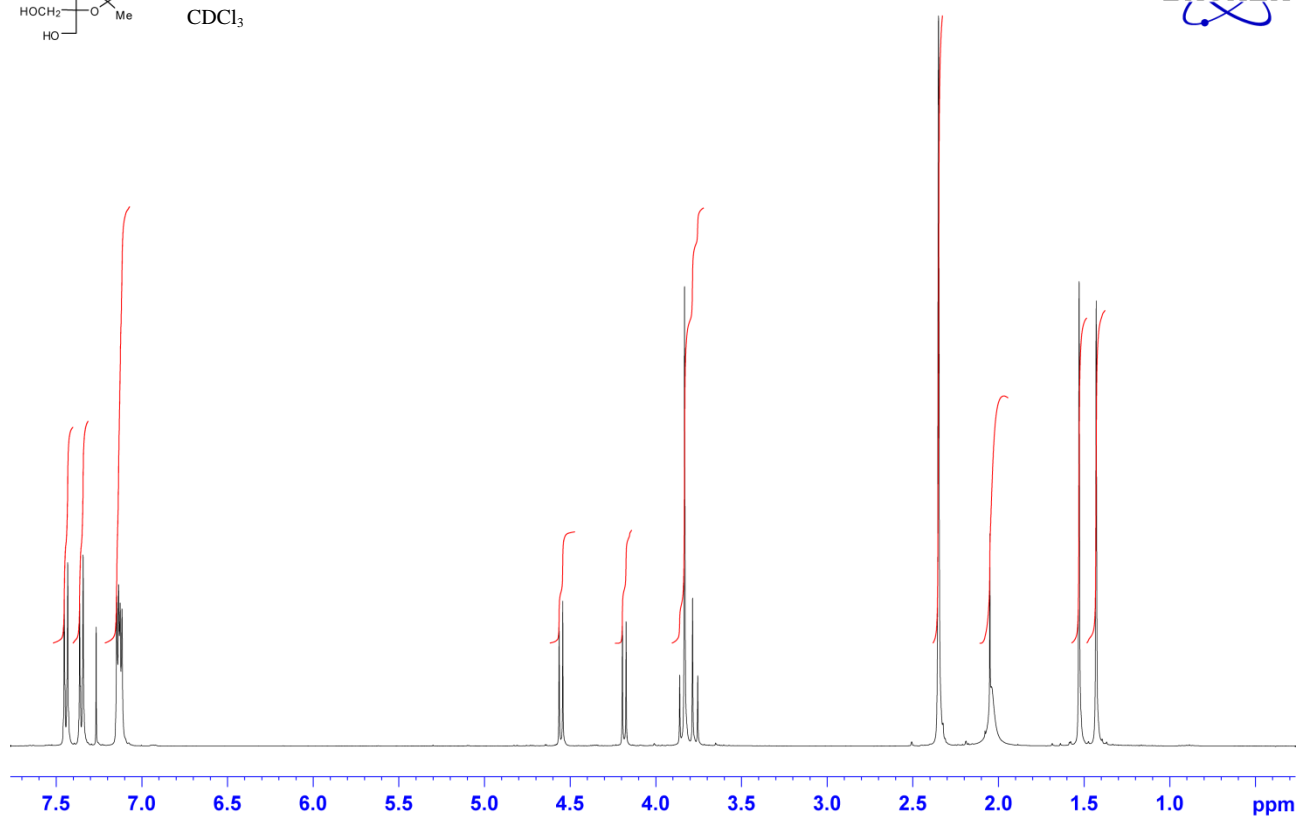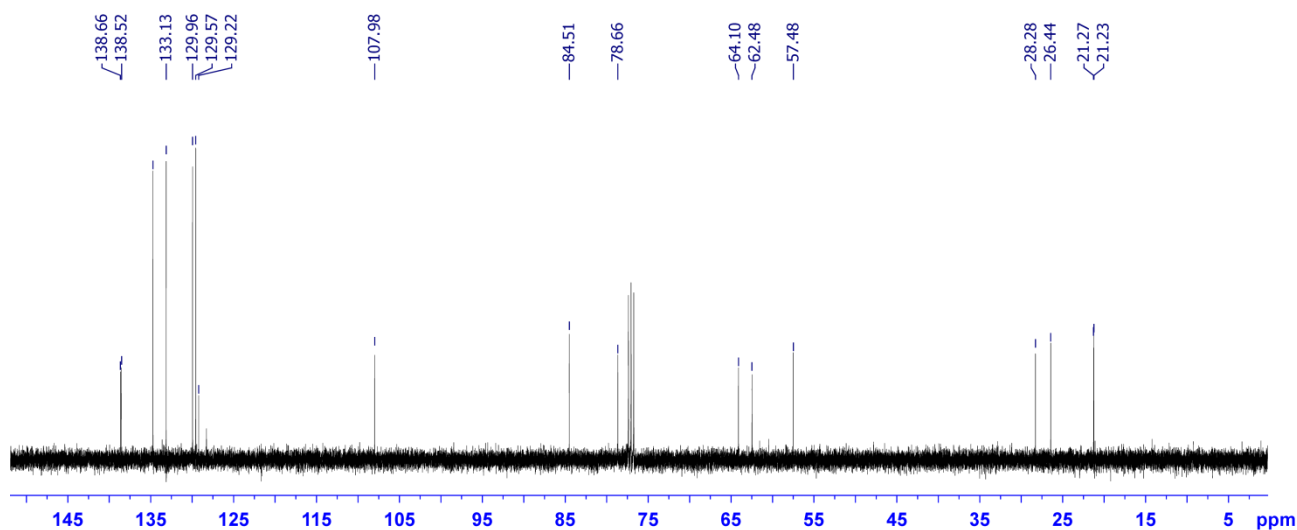

### Compound 35

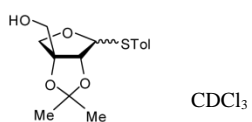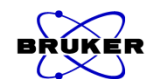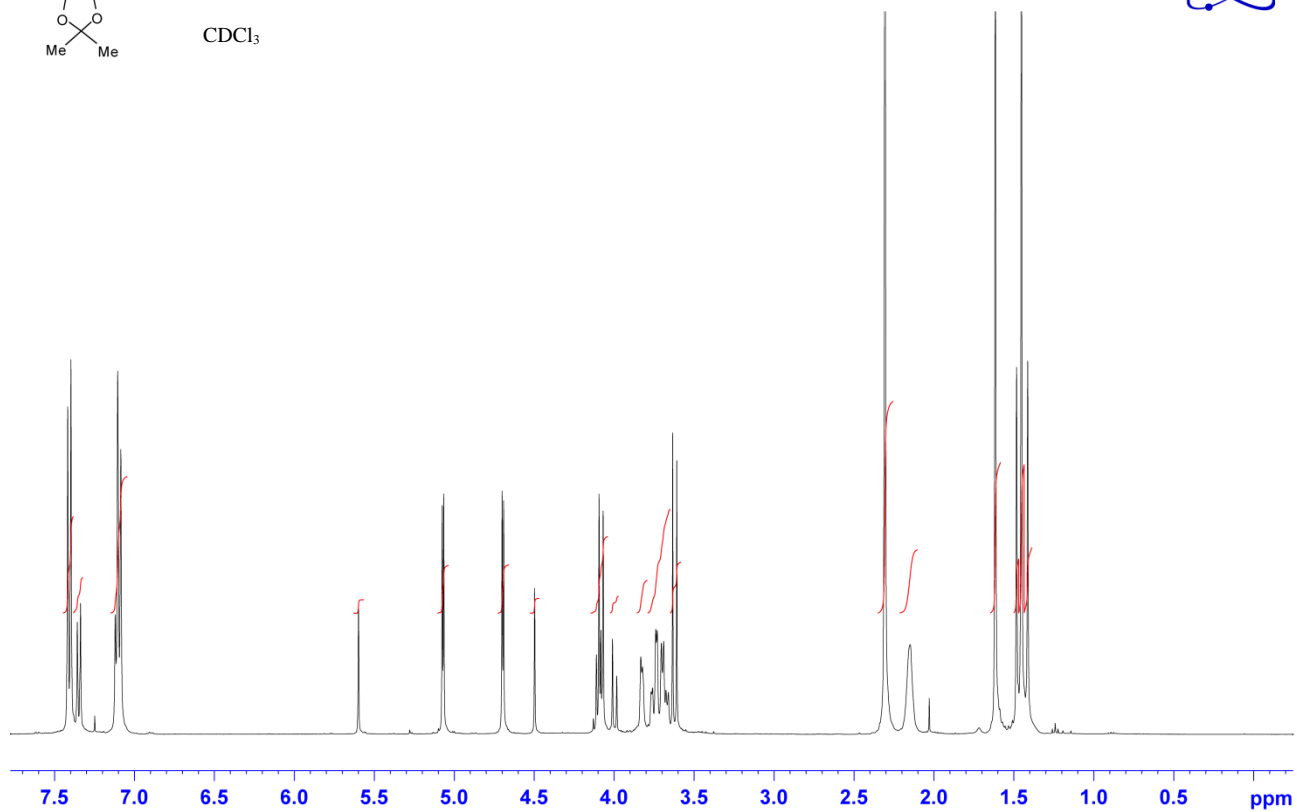

### Compound 36a

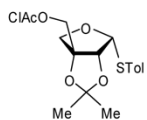

CDCl<sub>3</sub>

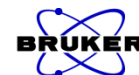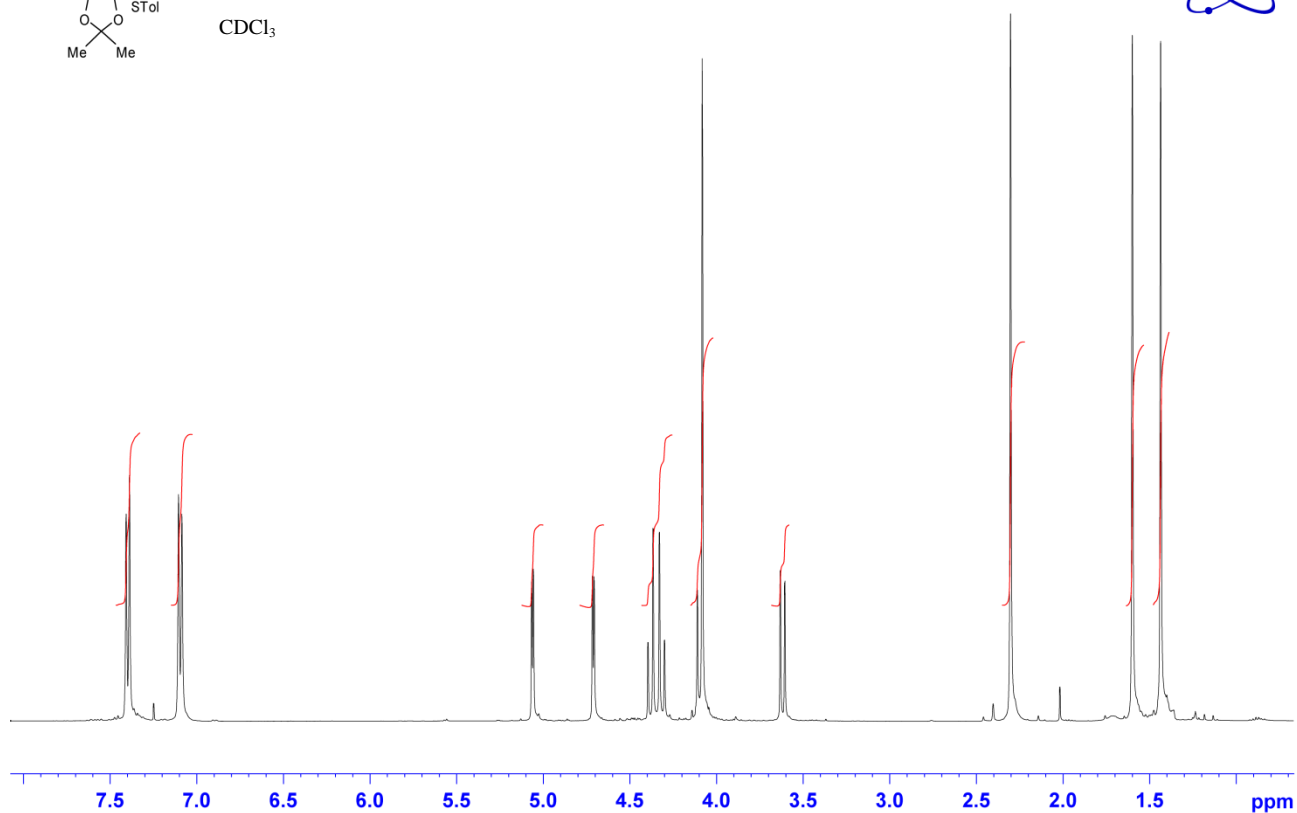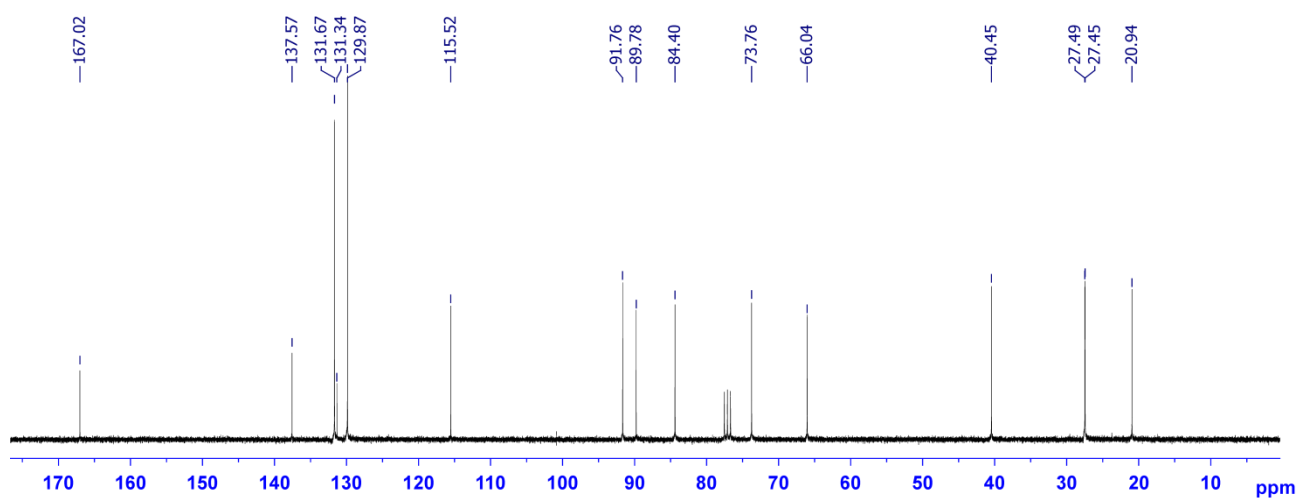

### Compound 36b

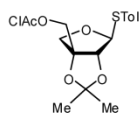

CDCl<sub>3</sub>

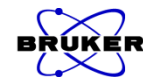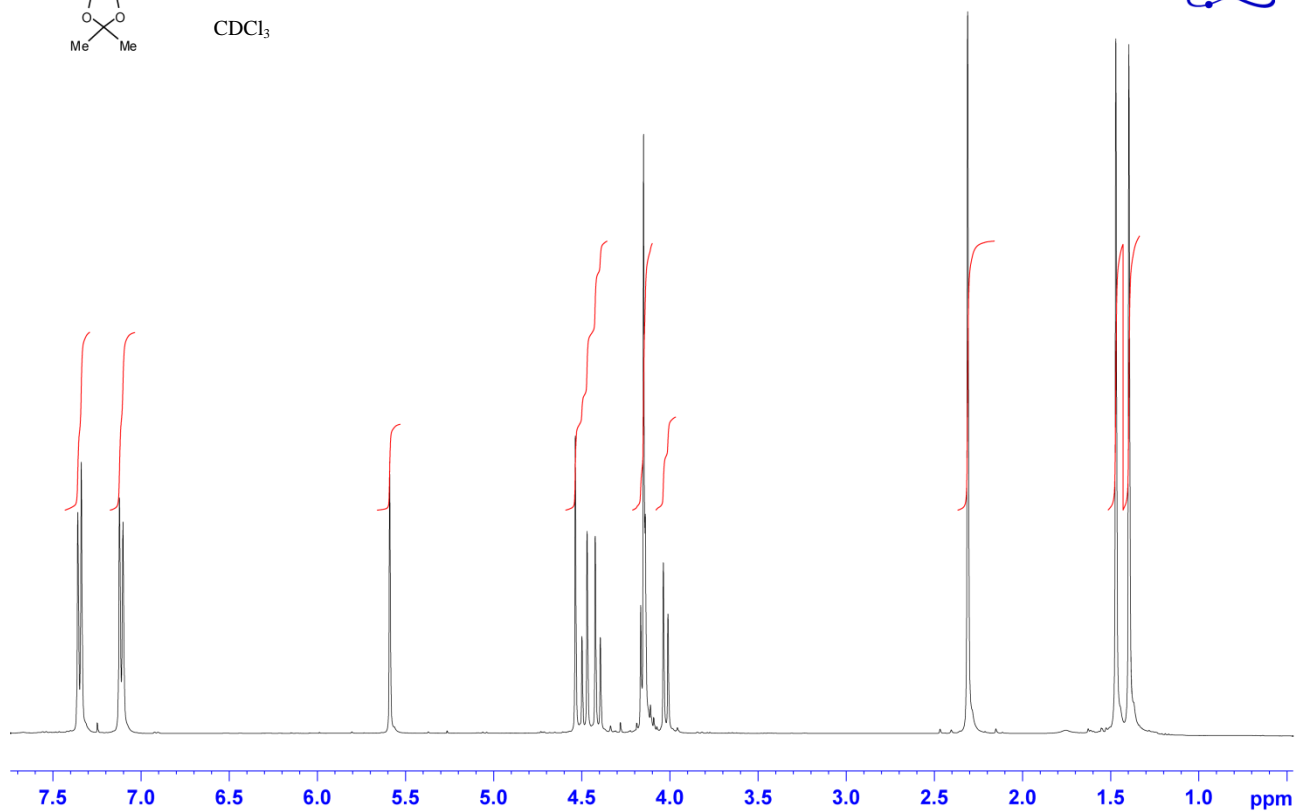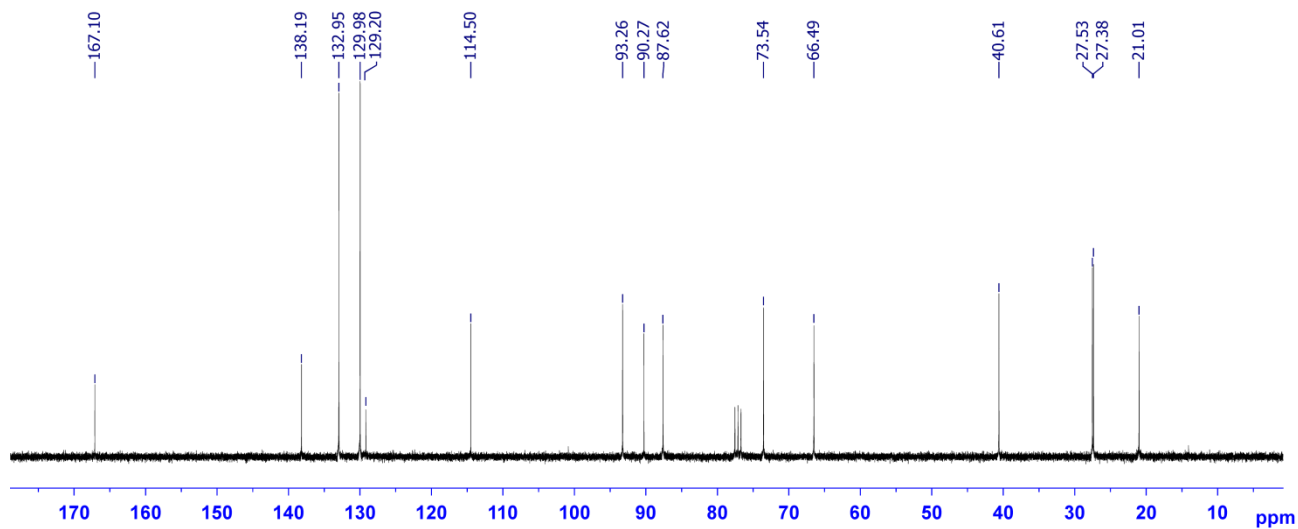

Compound **37a,b**

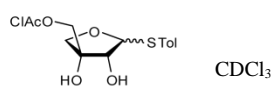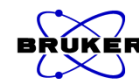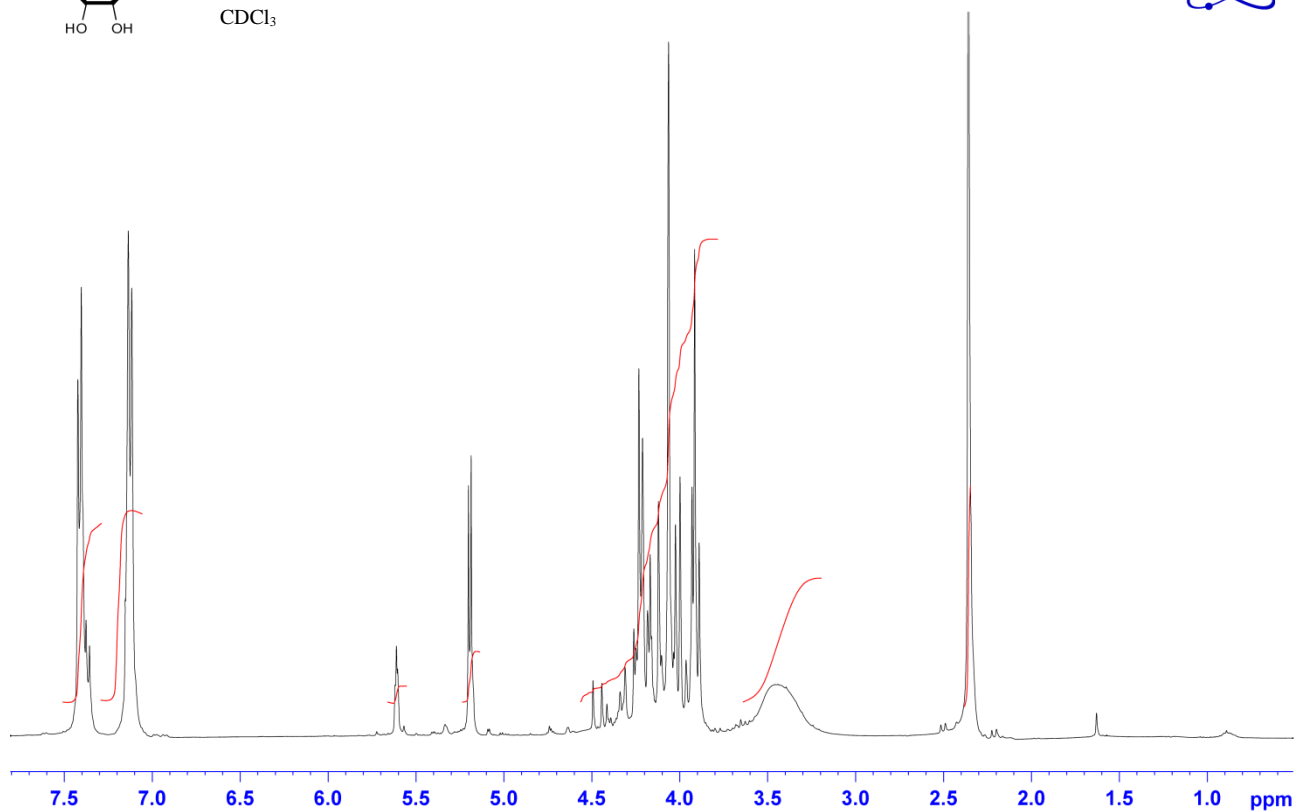

### Compound 38a

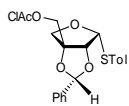

CDCl<sub>3</sub>

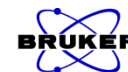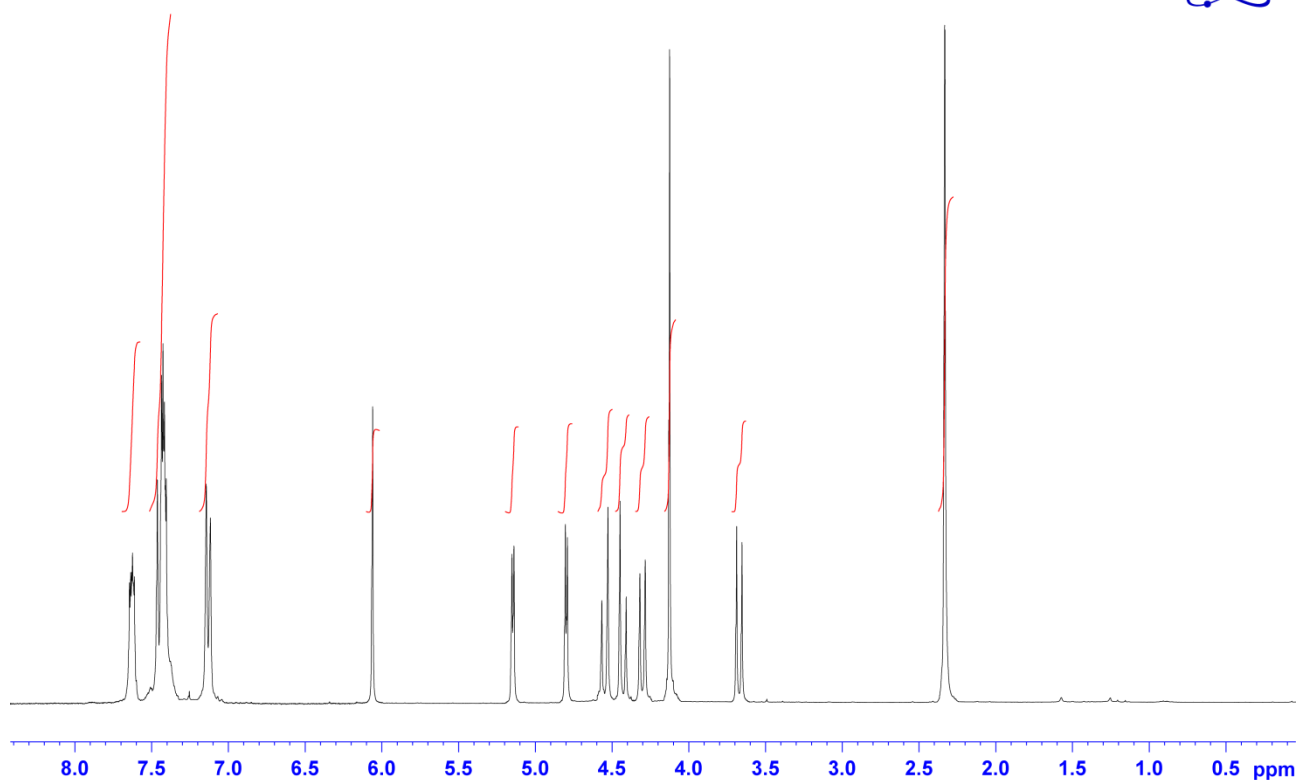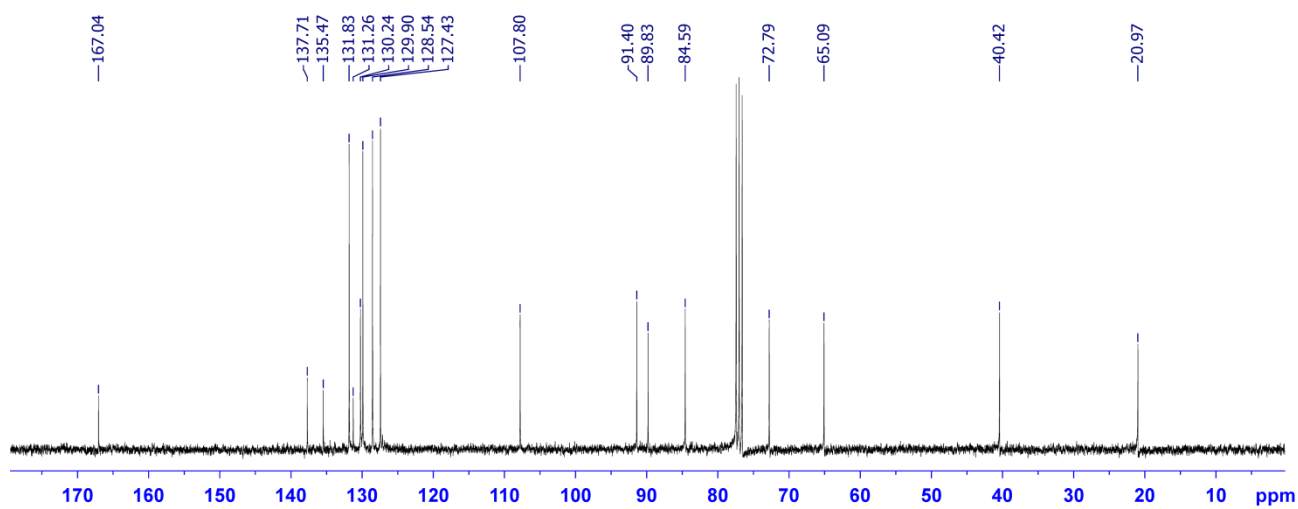

### Compound 38b

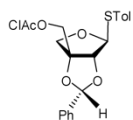

CDCl<sub>3</sub>

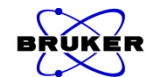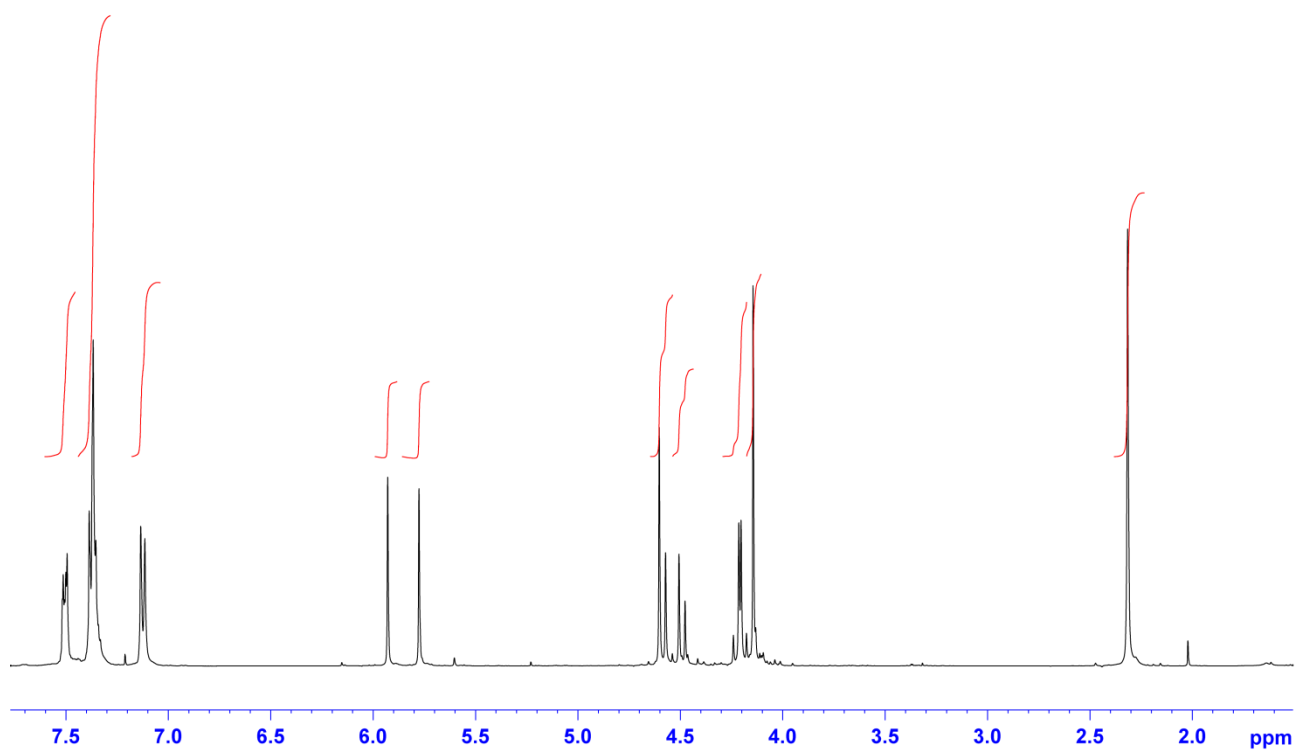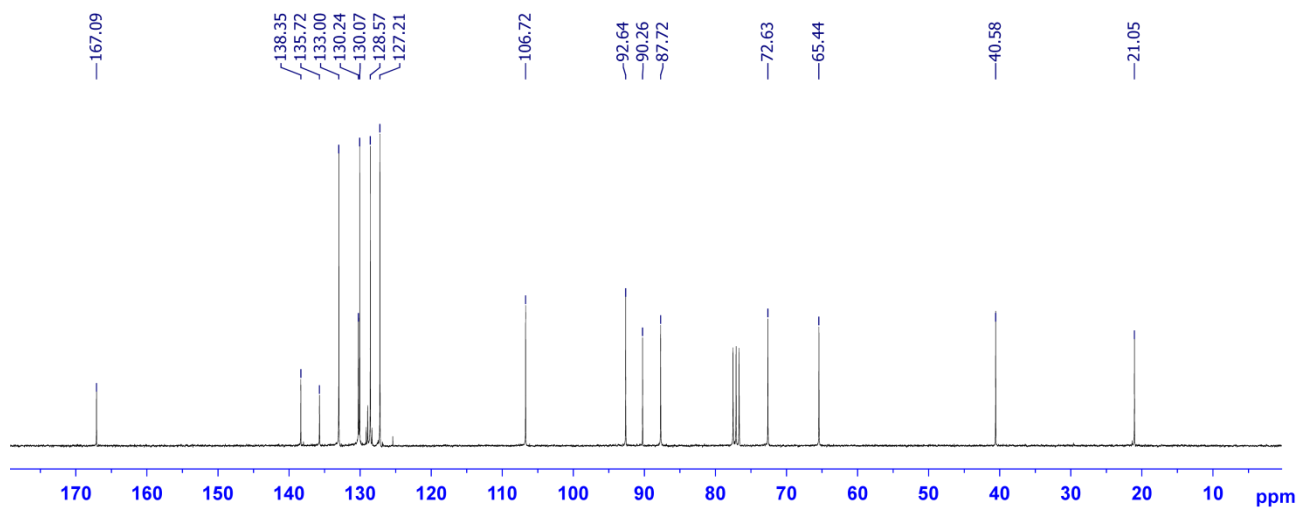

### Compound 39

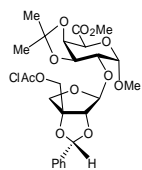

CDCl<sub>3</sub>

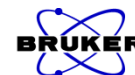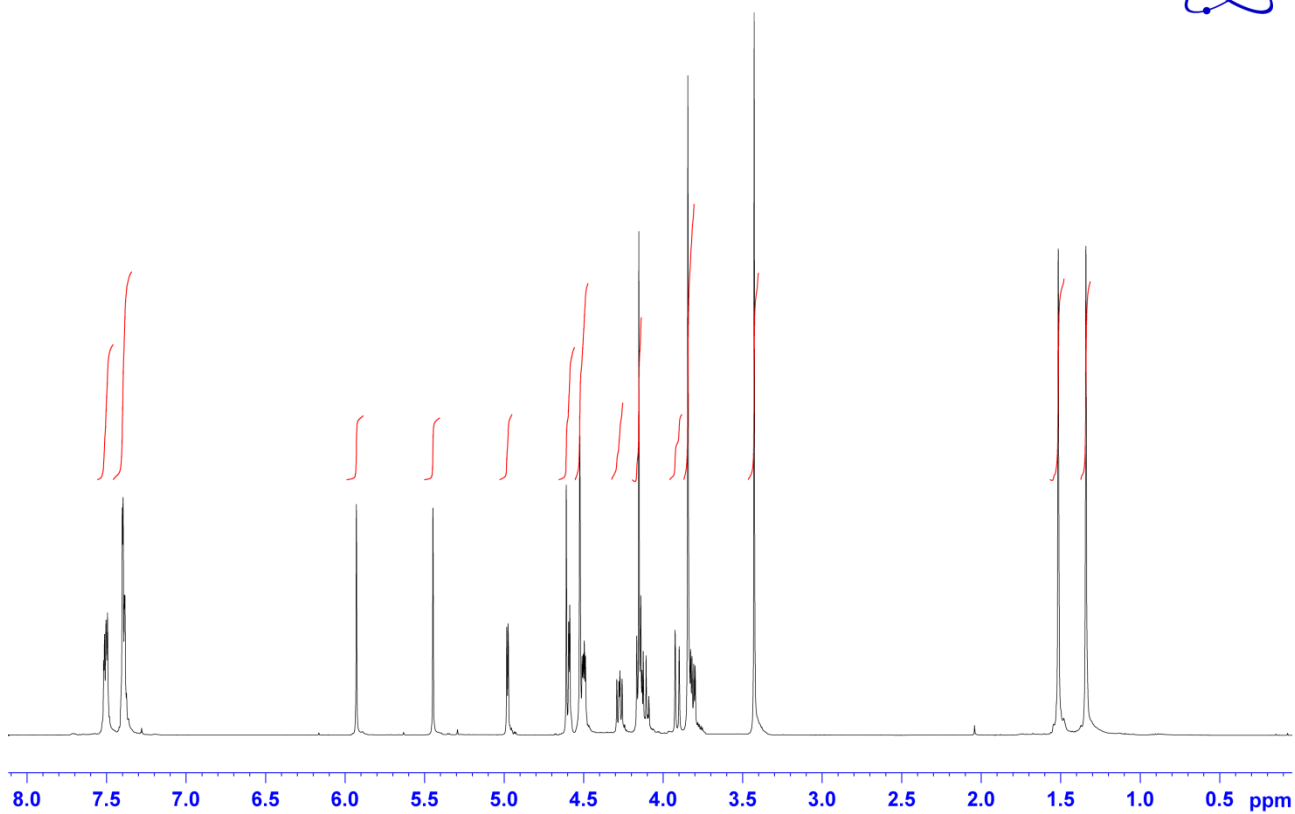

~168.47  
~167.10

~135.61  
~133.87  
~130.14  
~128.53  
~127.14

~109.95  
~107.55  
~106.40

~99.67

~89.47  
~86.90

~75.94  
~74.83  
~73.72  
~72.87

~67.01  
~65.52

~56.07  
~52.46

~40.47

~28.04  
~26.22

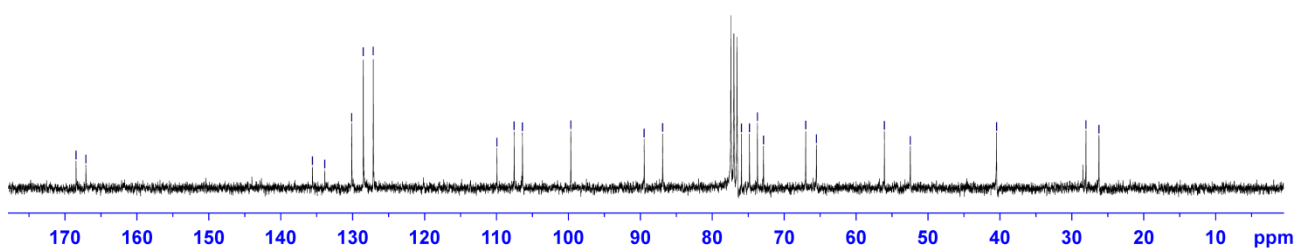



### Compound 40

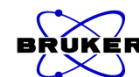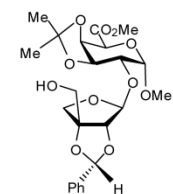

CDCl<sub>3</sub>

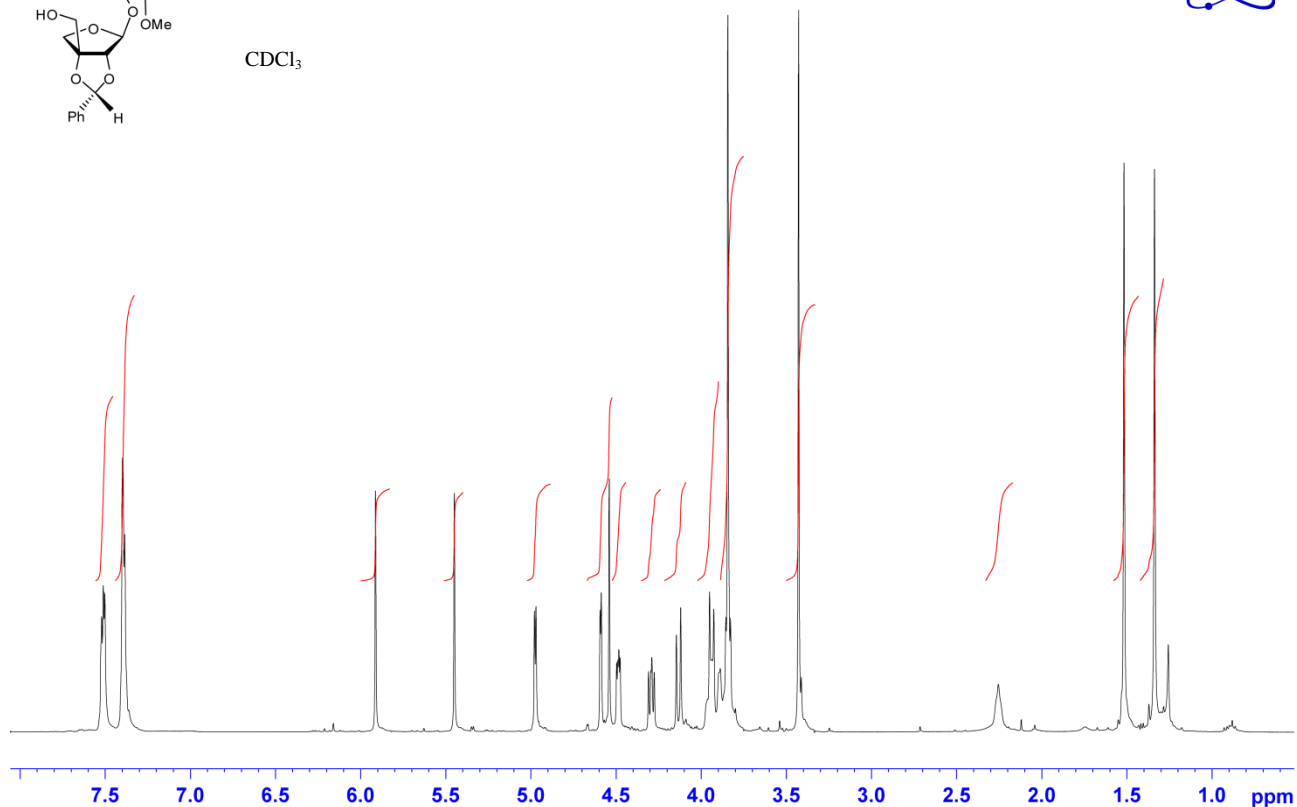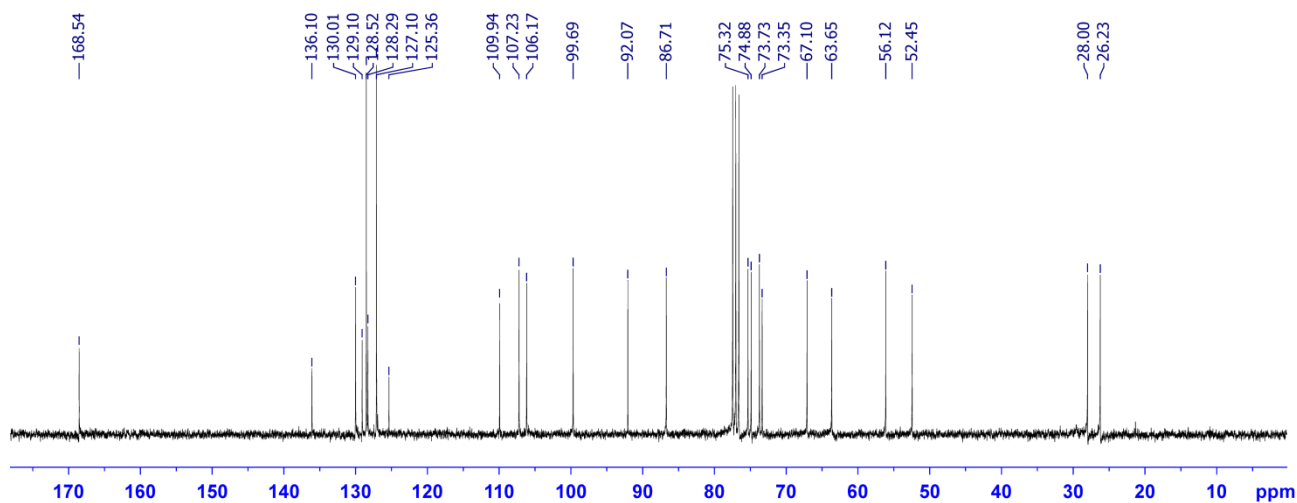



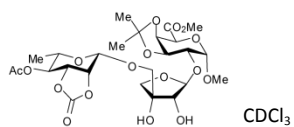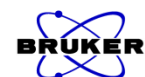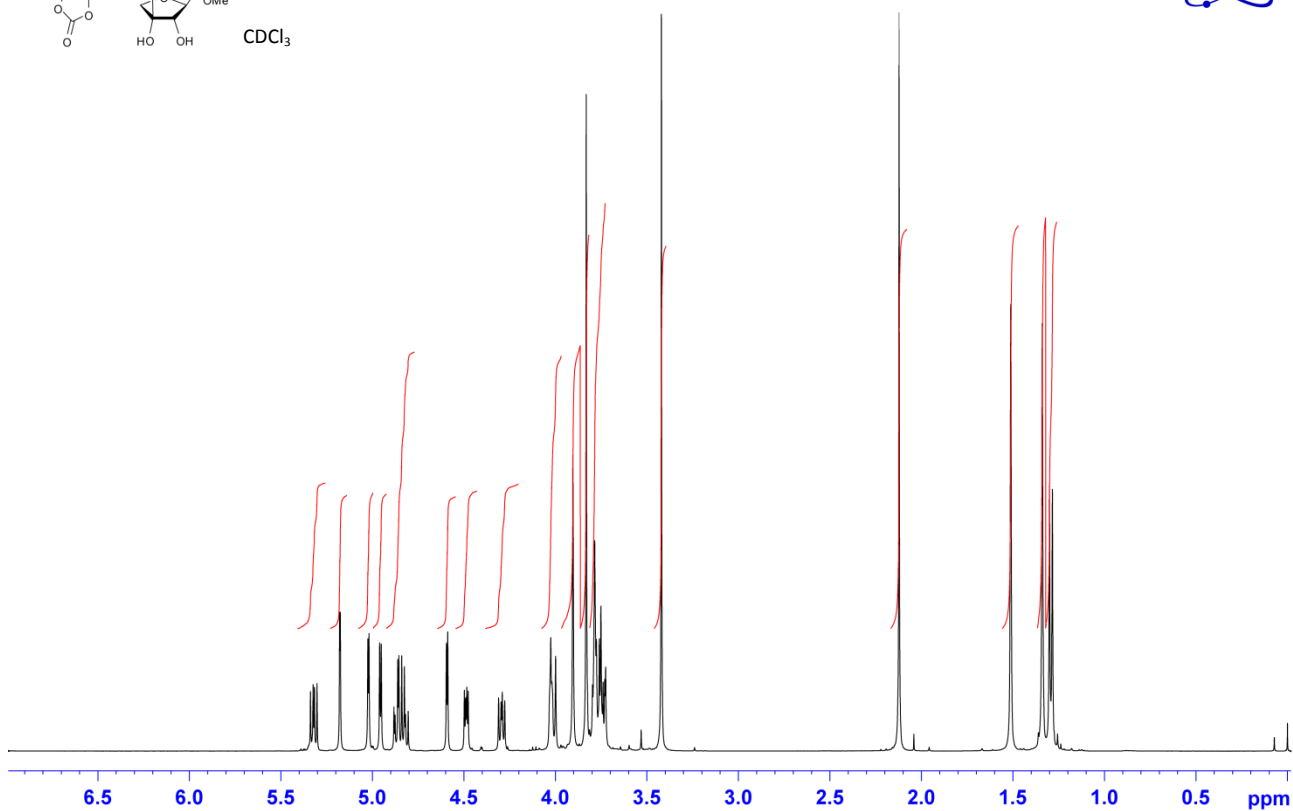

### Compound 42

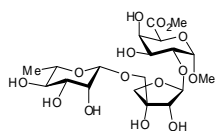

D<sub>2</sub>O

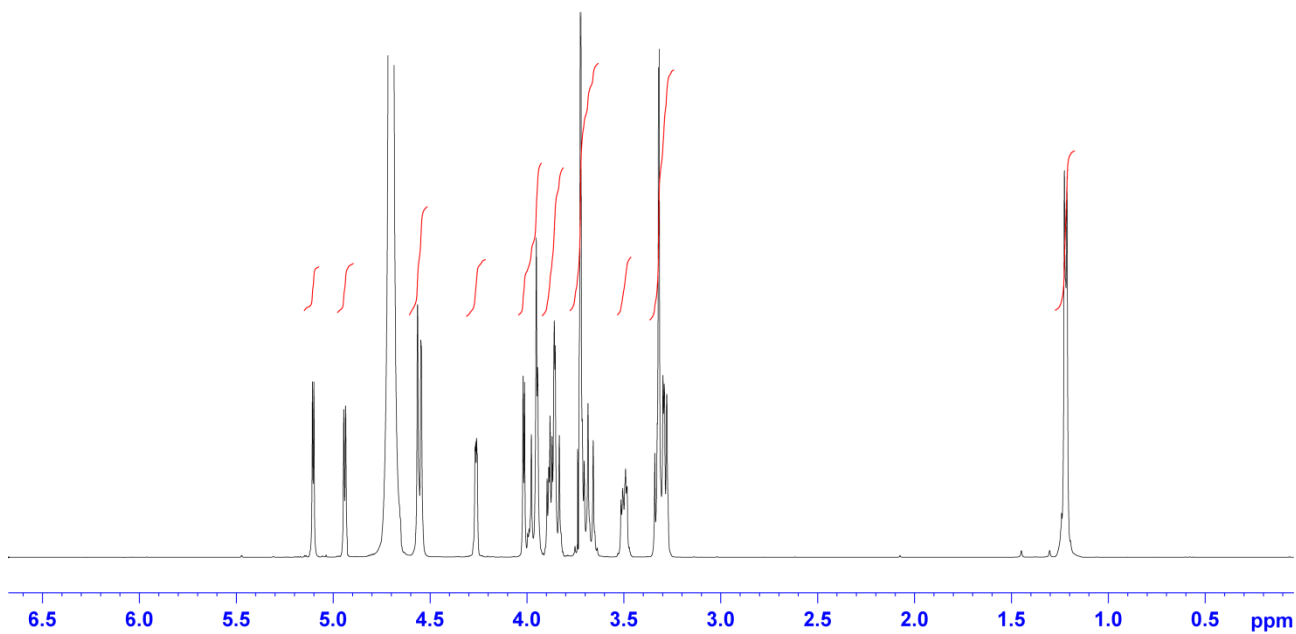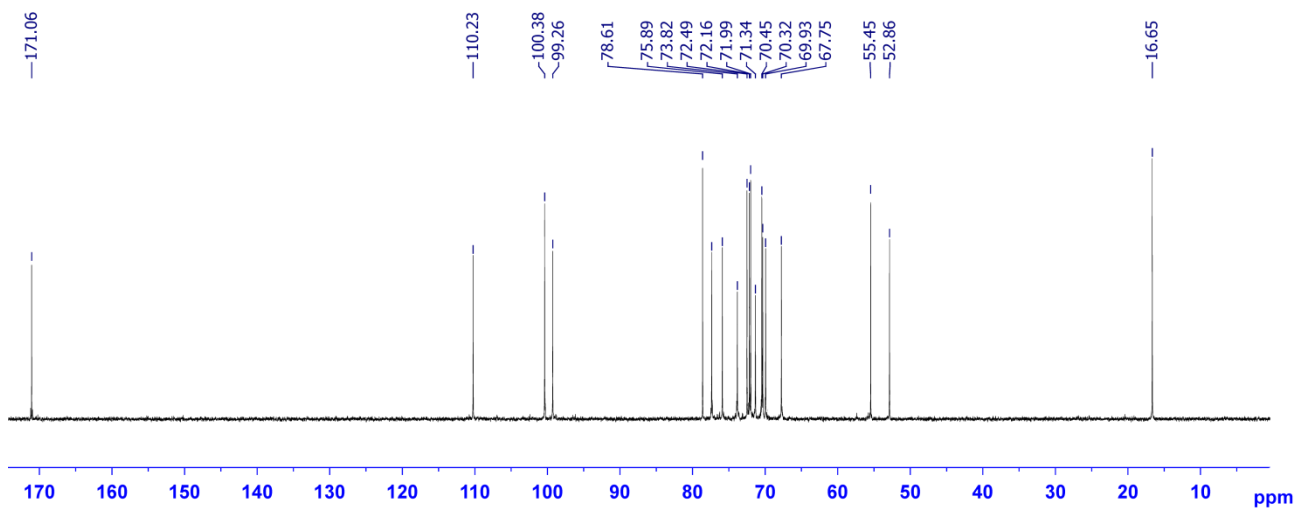

### Compound 1

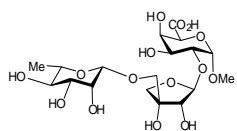

D<sub>2</sub>O (1D NOESY presaturation)

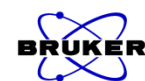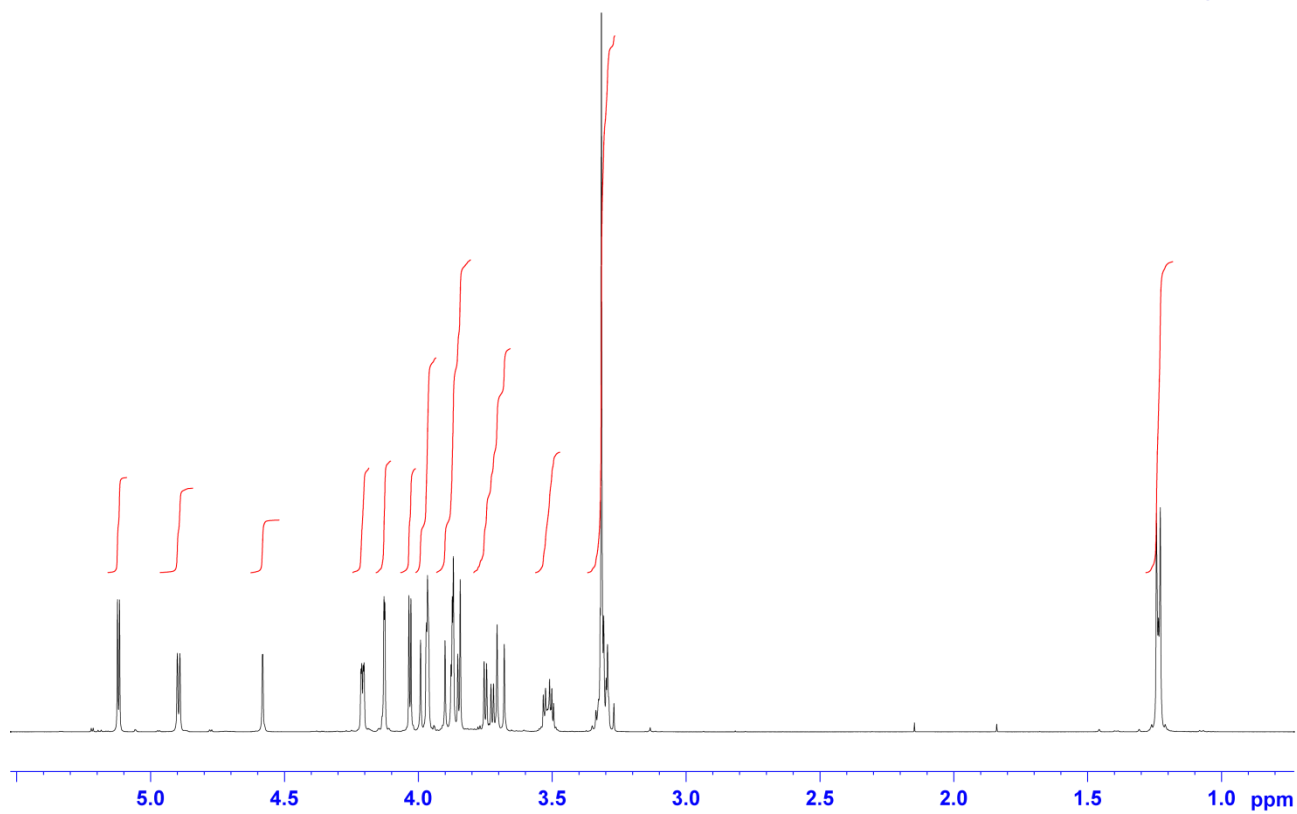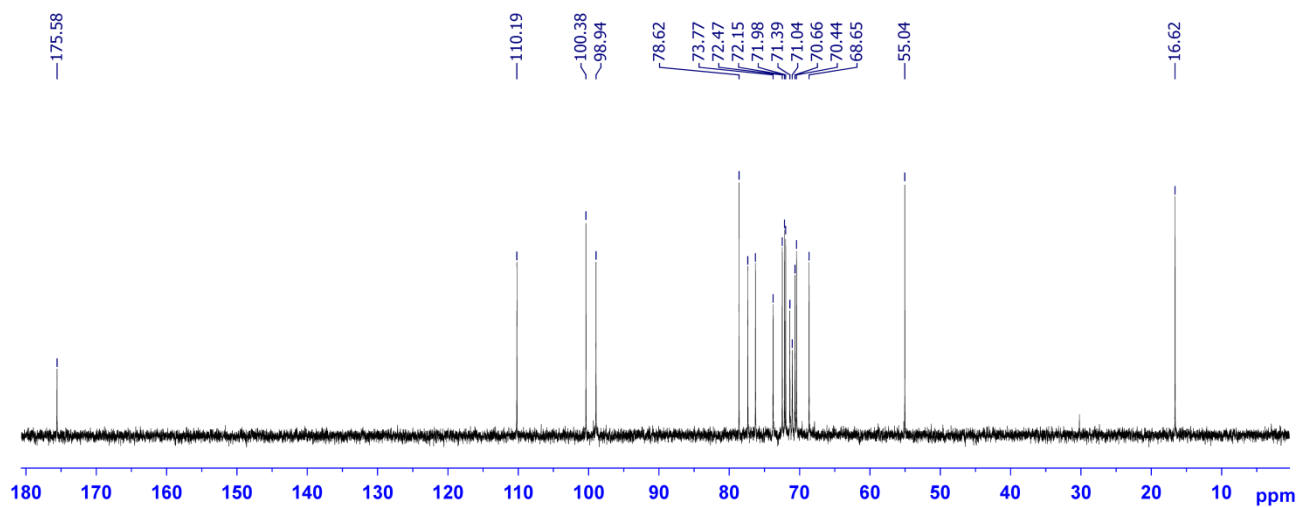

## Compound 2

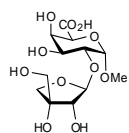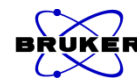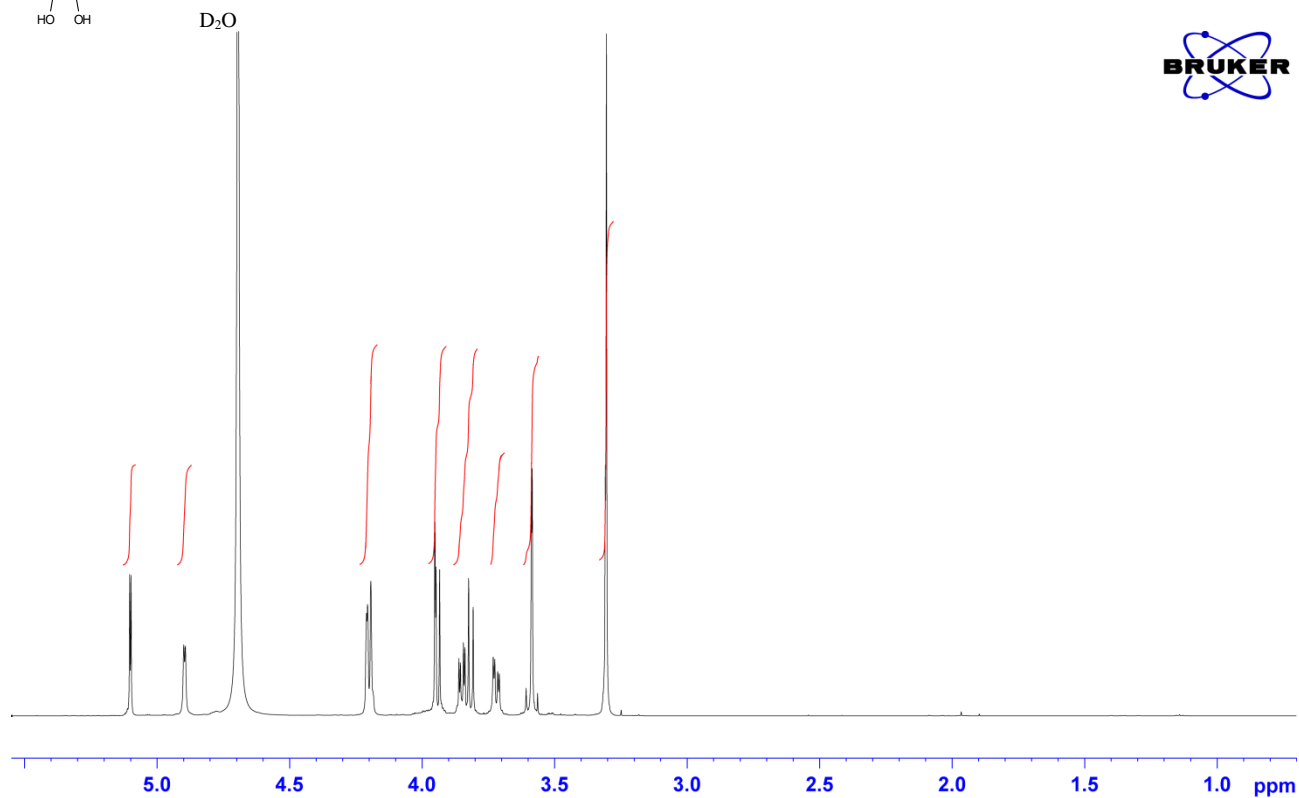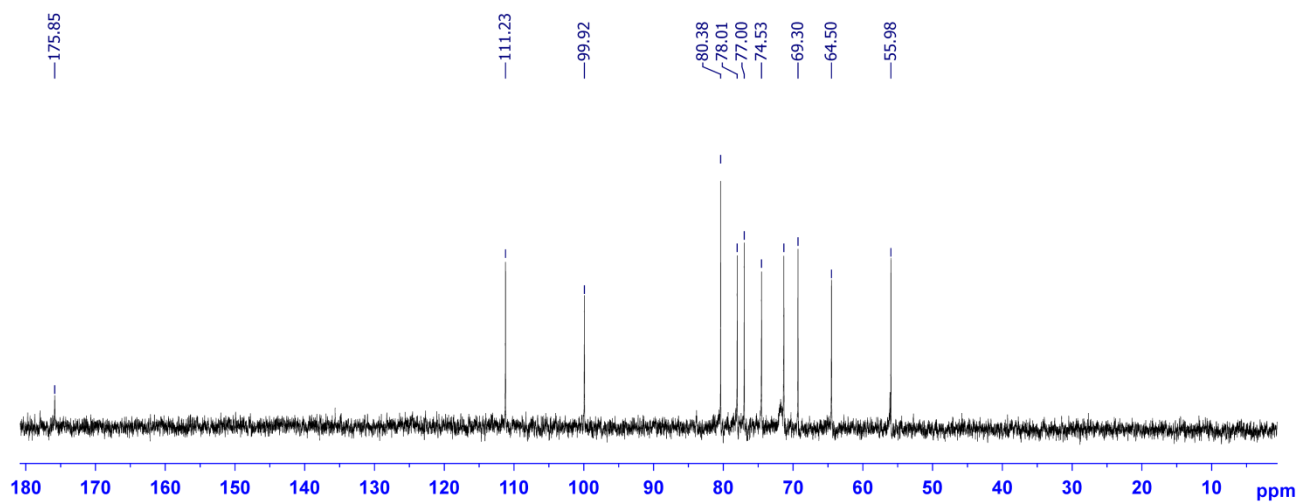

### Compound 3

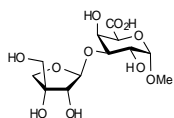

D<sub>2</sub>O (1D NOESY presaturation)

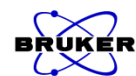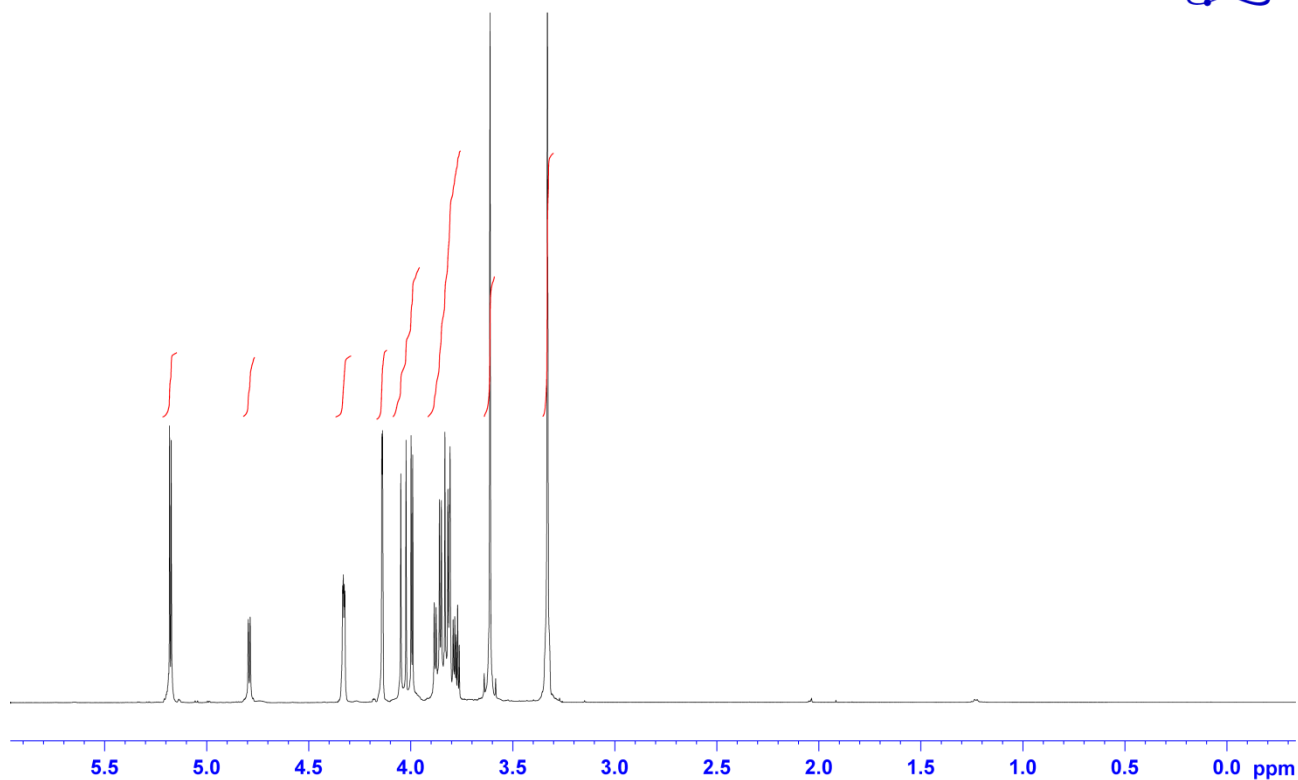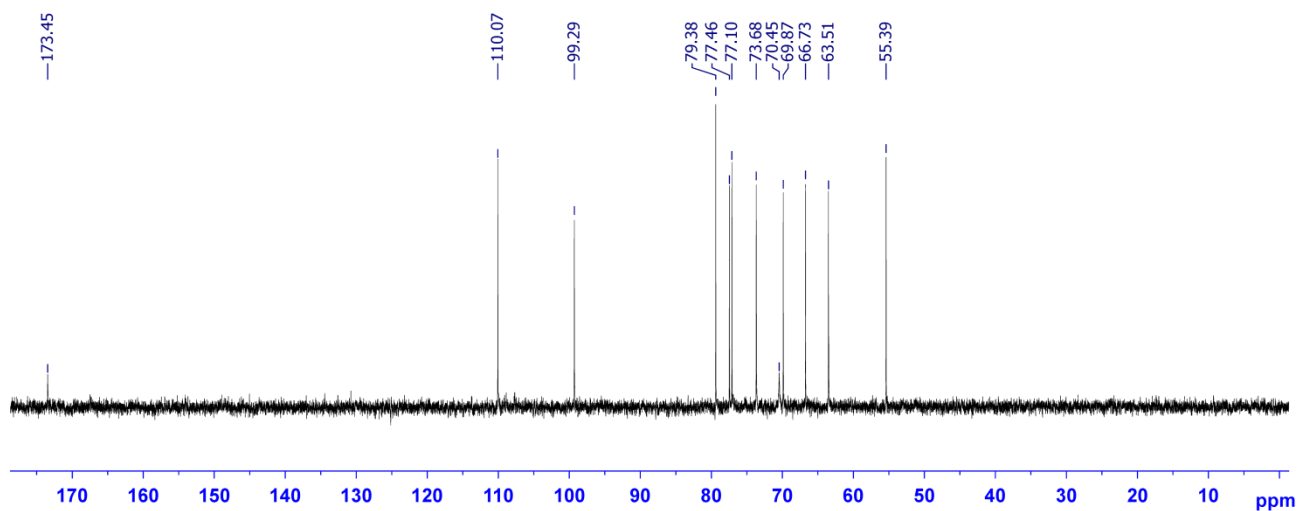

### Compound 4

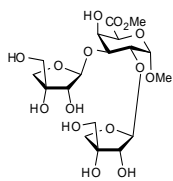

D<sub>2</sub>O (1D NOESY presaturation)

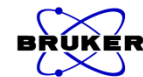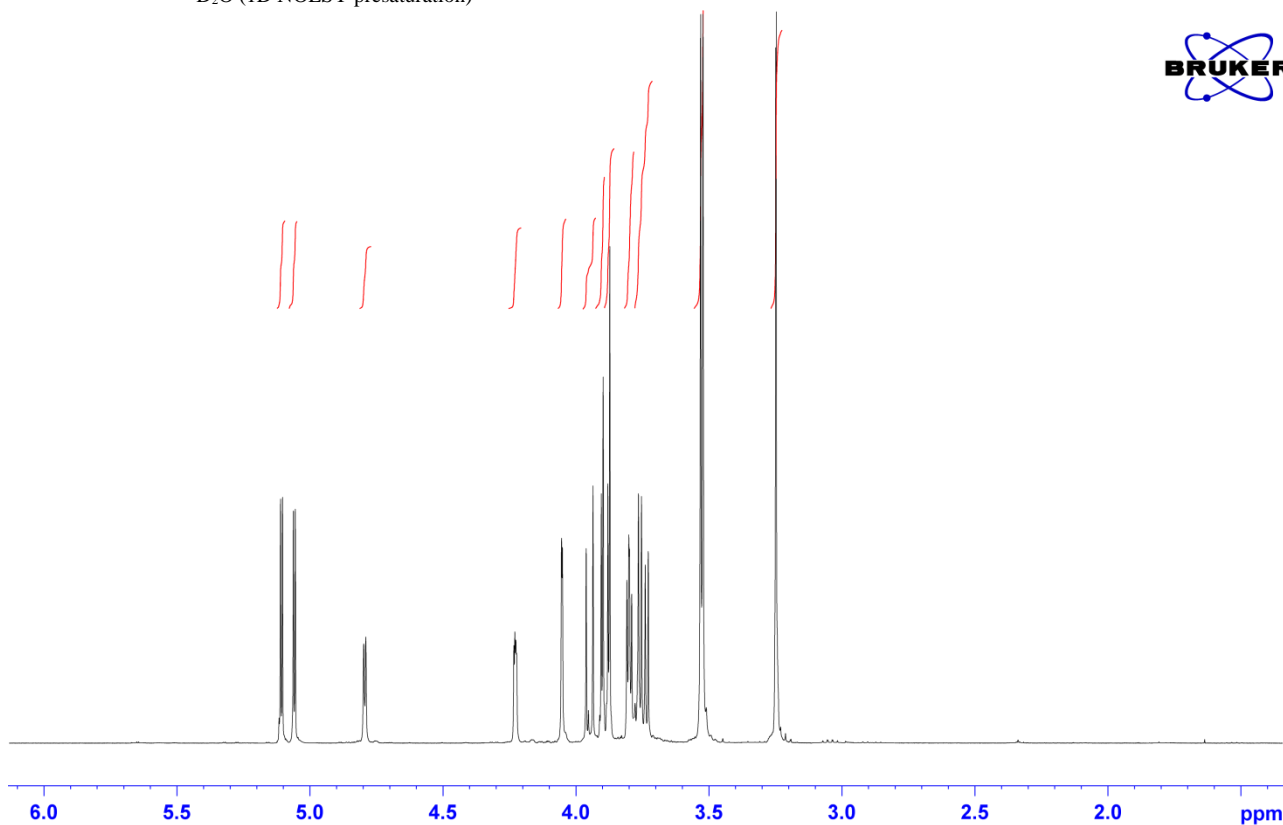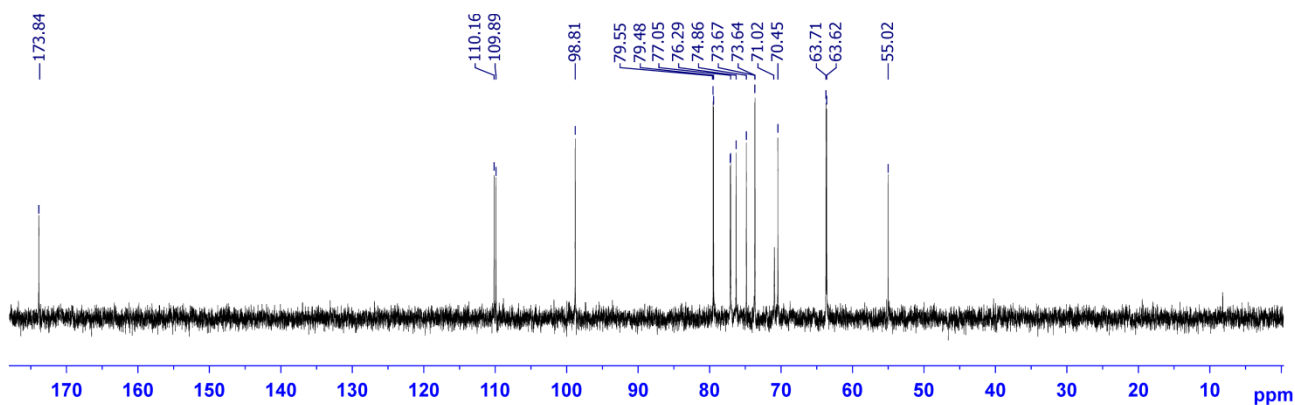

Supplement: c1ob05587a.pdf [file c1ob05587a.pdf]
